# Supplementary material
Source: Elsevier journal article supplement (https://www.sciencedirect.com/science/article/pii/S2173574320300447)
Supplement: mmc1 [file S2173574320300447:mmc1.pdf]

## **CONTROL DEL EMBARAZO EN PACIENTES CON LUPUS ERITEMATOSO SISTÉMICO/SÍNDROME ANTIFOSFOLÍPIDO:**

### **Parte 2: Seguimiento del embarazo**

**Documento de consenso de la Sociedad Española de Ginecología y Obstetricia (SEGO), Grupo de Enfermedades Autoinmunes Sistémicas (GEAS) de la Sociedad Española de Medicina Interna (SEMI) y Sociedad Española de Reumatología (SER)**

**Esther Rodríguez Almaraz<sup>1</sup>, Luis Sáez-Comet<sup>2</sup>, Manel Casellas<sup>3</sup>, Paloma Delgado<sup>4</sup>, Amaia Ugarte<sup>5</sup>, Paloma Vela-Casasempere<sup>6</sup>, Nuria Martínez Sánchez<sup>7</sup>, Maria Galindo-Izquierdo<sup>1</sup>, Gerard Espinosa<sup>8</sup>, Beatriz Marco<sup>9</sup>, Juan Antonio Martínez López<sup>10</sup>, Angel Robles<sup>11</sup>, Víctor Martínez-Taboada<sup>12</sup>, Jose Luis Bartha<sup>7</sup> y Guillermo Ruiz-Irastorza<sup>5</sup>**

<sup>1</sup>Servicio de Reumatología, Hospital 12 de Octubre, Madrid; <sup>2</sup> Unidad de Enfermedades Autoinmunes Sistémicas (UEAS), Servicio de Medicina Interna, Hospital Universitario Miguel Servet, Zaragoza; <sup>3</sup>Unitat Alt Risc Obstetric, Vall d' Hebron Hospital Campus, Barcelona; <sup>4</sup>Servicio de Obstetricia y Ginecología, Biocruces Bizkaia Health Research Institute, Hospital Universitario Cruces, Barakaldo, Bizkaia; <sup>5</sup>Unidad de Enfermedades Autoinmunes, Servicio de Medicina Interna, BioCruces Bizkaia Health Research Institute, Hospital Universitario Cruces, UPV/EHU, Barakaldo, Bizkaia; <sup>6</sup>Sección de Reumatología, Hospital General Universitario Alicante, Instituto de investigación sanitaria y biomédica ISABIAL – FISABIO, Departamento de Medicina Clínica, Universidad Miguel Hernandez, Alicante; <sup>7</sup>Servicio de Ginecología y Obstetricia, Hospital Universitario La Paz, Madrid; <sup>8</sup> Department of Autoimmune Diseases, Hospital Clinic, Biological aggression and response mechanisms, IDIBAPS, Barcelona, Universitat de Barcelona; <sup>9</sup>Servicio de Ginecología y Obstetricia, HUP La Fe, Valencia; <sup>10</sup>Servicio de Reumatología, Hospital Universitario Fundación Jiménez Díaz, Madrid; <sup>11</sup> Servicio de Medicina Interna, Hospital Universitario La Paz, Madrid; <sup>12</sup>Servicio de Reumatología, Hospital Universitario Marqués de Valdecilla, IDIVAL, Facultad de Medicina, Universidad de Cantabria, Santander.

CORRESPONDENCIA:

Guillermo Ruiz Irastorza  
r.irastorza@outlook.es

**Objetivo:** Las Sociedades Españolas de Ginecología y Obstetricia, de Medicina Interna y de Reumatología han constituido un grupo de trabajo paritario para la elaboración de tres documentos de consenso sobre el control del embarazo en mujeres con lupus eritematoso sistémico (LES) y síndrome antifosfolípido (SAF).

**Métodos:** Cada una de las sociedades científicas implicadas propuso cinco representantes en base a su experiencia en el área del control del embarazo en pacientes con enfermedades autoinmunes. Las recomendaciones se elaboraron siguiendo la metodología Delphi.

**Resultados:** En este segundo documento se incluyen las recomendaciones que abordan el manejo del embarazo normal y sus complicaciones en mujeres con LES/SAF. Se presentan las recomendaciones relacionadas con el seguimiento del embarazo, la actividad lúpica, el bloqueo cardíaco congénito, las manifestaciones trombóticas y obstétricas del SAF y los defectos de placentación

**Conclusiones:** Estas recomendaciones multidisciplinarias se consideran herramientas en la toma de decisiones para los clínicos involucrados en la asistencia a pacientes con LES/SAF durante el embarazo.

**Palabras clave**

Lupus eritematoso sistémico; Síndrome antifosfolípido; Embarazo; Lactancia;  
Anticoncepción; Puerperio.

## **PREGNANCY CONTROL IN PATIENTS WITH SYSTEMIC LUPUS ERYTHEMATOSUS/ANTIPHOSPHOLIPID SYNDROME:**

### **Part 2: Pregnancy follow-up**

**Consensus document of the Spanish Society of Gynaecology and Obstetrics (SEGO), the Systemic Autoimmune Diseases Group (GEAS) of the Spanish Society of Internal Medicine (SEMI and the Spanish Society of Rheumatology (SER)**

**Objective:** In order to agree on the fundamental aspects related to the management of pregnancy in patients with systemic lupus erythematosus (SLE) and antiphospholipid syndrome (APS), the Spanish Societies of Gynaecology and Obstetrics, Internal Medicine and Rheumatology set up a working group for the preparation of three consensus documents.

**Methods:** Each of the Scientific Societies involved proposed five representatives based on their experience in the field of pregnancy control in patients with autoimmune diseases. The recommendations were developed following the Delphi methodology.

**Results:** This second document contains the recommendations regarding the management of pregnancy in women with SLE and APS, including complications such as lupus activity, congenital heart block, thrombotic and obstetric manifestations of APS and placental vascular disease.

**Conclusions:** These multidisciplinary recommendations are considered decision-making tools for clinicians involved in the care of patients with SLE/APS during pregnancy.

## **Keywords**

Systemic lupus erythematosus; Antiphospholipid syndrome; Pregnancy; Lactation; Contraception; Puerperium.

## **INTRODUCCIÓN**

Tras la primera parte dedicada a la valoración preconcepcional, la infertilidad y la preservación ovárica, en este segundo documento se aborda de forma específica el control de la paciente desde el momento de la concepción hasta el parto. Se plantearon cuestiones relacionadas con el seguimiento básico del embarazo y el tratamiento de las diferentes complicaciones, tanto las relacionadas directamente con el lupus eritematoso sistémico (LES) y el síndrome antifosfolípido (SAF) como las asociadas a los defectos de placentación y complicaciones vasculares, de particular riesgo en estas entidades.

## **MATERIAL Y MÉTODOS**

Tal y como se detalla en la primera parte de este documento de consenso, las recomendaciones se elaboraron siguiendo la metodología Delphi. El grupo de trabajo específico para esta sección contó con dos representantes de la Sociedad Española de Ginecología y Obstetricia (SEGO), dos del Grupo de Enfermedades Autoinmunes Sistémicas (GEAS) de la Sociedad Española de Medicina Interna (SEMI) y dos de la Sociedad Española de Reumatología (SER), además de un coordinador.

Todas las recomendaciones aparecen contenidas en la tabla 1.

## **DOCUMENTO FINAL DE CONSENSO**

### **1. Seguimiento básico del embarazo.**

### **1.A ¿Cuál es el perfil básico de seguimiento de embarazo en LES y/o SAF?**

- **Se sugiere realizar visitas, como mínimo, cada 4 semanas hasta la semana 36, quincenales hasta la semana 38 y posteriormente semanales [NE 4, GR D].**
- **En caso de actividad de la enfermedad o complicaciones obstétricas, se sugiere adecuar el seguimiento a la situación clínica [NE 4, GR D].**
- **En cada visita se sugiere, además de realizar una evaluación clínica, la toma de tensión arterial y peso [NE 4, GR D].**
- **Se sugiere incluir en el protocolo de analíticas del seguimiento de la gestación las determinaciones necesarias de evaluación de la actividad según la situación clínica de la paciente, incluyendo en cada visita un sedimento de orina con proteinuria, o, al menos, una tira reactiva de orina [NE 4, GR D].**
- **Se recomienda la realización de cribado de defectos de placentación en la primera mitad de la gestación [NE 1++, GR A].**
- **Se sugiere realizar ecografías seriadas cada 4 semanas a partir de semana 24 para control del crecimiento fetal [NE 4, GR D].**

El seguimiento de las pacientes embarazadas con LES y/o SAF debe ser riguroso tanto desde el punto de vista obstétrico como desde el de la enfermedad de base. Se llevará a cabo de manera preferente en unidades multidisciplinarias con obstetras experimentados en gestaciones de riesgo y reumatólogos e internistas habituados al manejo de embarazadas, con el objetivo de detectar de forma precoz la aparición de complicaciones materno-fetales (1,2).

No existen estudios que hayan evaluado el impacto de diferentes esquemas de monitorización en el resultado final del embarazo. La periodicidad de las visitas dependerá de la evaluación obstétrica y de la gravedad de la enfermedad, así como del riesgo de aparición de complicaciones. Las pacientes estables tendrán una periodicidad de consultas mensual hasta la semana 36, quincenal hasta la 38 y semanal hasta el final de la gestación. Las visitas serán más frecuentes en caso de brotes o aparición de complicaciones obstétricas (1–3).

La visita debe incluir una exploración física con toma de tensión arterial y peso, así como una historia clínica centrada en la presencia de datos clínicos de actividad de la enfermedad. Se considera importante disponer en cada visita de un análisis básico de orina, con el objeto de detectar la presencia de proteinuria que puede alertar, junto con la clínica de la paciente, del desarrollo de un brote renal y/o preeclampsia (PE). La determinación de niveles séricos de C3 y C4 y de anticuerpos anti-DNA de doble cadena (anti-dsDNA) debe estar guiada por la situación clínica de la paciente (2).

Para el control fetal, se realizará el seguimiento ecográfico rutinario de la gestación que debe incluir una ecografía del primer trimestre entre la 11-14 semanas y ecografía morfológica de semana 20. Tal y como se discute en la sección 6, el despistaje de defectos de placentación y la estimación de riesgo de PE se recomienda de forma generalizada en las guías de práctica clínica (4,5).

Asimismo, se aconseja la realización de ecografías seriadas para biometría fetal y valoración de líquido amniótico en tercer trimestre aproximadamente cada 4 semanas para la detección precoz de fetos pequeños para edad gestacional (FPEG), y, junto con el Doppler de arteria umbilical (AU), crecimientos intrauterinos retardados (CIR) (6,7).

El control del bienestar fetal al final de la gestación se basa, además de los controles ecográficos descritos, en la realización de registro cardiotocográfico a partir de la semana 36-37 de gestación y de forma semanal hasta la finalización de la gestación (7).

## **1.B ¿En qué situaciones clínicas concretas hay que ampliar el seguimiento?**

### **1.B.1 Nefritis Lúpica (NL)**

- **Al seguimiento básico de la paciente con LES se sugiere añadir la determinación de ratio proteína-creatinina (Pr/Cr) con cada analítica y si resultase patológico valorar la confirmación con proteinuria 24h [NE 4, GR D].**

Desde el punto de vista del control materno, se aconsejan visitas mensuales que incluyan la historia y la exploración física, incluya la realización de analítica en la que además de lo que se solicita en el basal, se añada la determinación del ratio de Pr/Cr en orina (8,9). En el caso de resultar patológico, se aconseja la cuantificación de

proteinuria de 24h, que es el mejor método para la valoración de la proteinuria durante la gestación (10).

La evaluación de otros marcadores de actividad de la enfermedad (disminución niveles de complemento, aumento de títulos de anticuerpos anti-dsDNA o sedimento urinario activo con hematuria) o la presencia de manifestaciones clínicas extrarrenales podría ayudar a la distinción entre brote renal y otras complicaciones como la PE o el empeoramiento aislado de la proteinuria residual de base, si la hubiera, sin afectación glomerular activa (6).

El control fetal es similar al recomendado para las pacientes con LES sin historia de nefritis (ver sección previa).

#### **Presencia de anticuerpos antifosfolípido (AAF)**

- **No se recomienda de forma rutinaria realizar monitorización de los niveles de AAF durante la gestación [NE 4, GRv].**

Los niveles de AAF deberían estar disponibles para la planificación del embarazo, y su monitorización durante el mismo no aporta información de interés para el control de la gestante (2).

#### **Presencia de anticuerpos anti-Ro/SS-A y/o anti-La/SS-B**

- **Al seguimiento básico de la paciente con LES se aconseja añadir la realización de ecocardiografía fetal periódica al menos entre las semanas 16-18 a 30-34 [NE 4, GR D].**
- **No existe evidencia sobre la pauta de periodicidad precisa para realizar la ecocardiografía fetal [GR v].**

El seguimiento materno-fetal de visitas en cuanto a la periodicidad y analíticas de la paciente con LES portadora de anticuerpos anti-Ro/SS-A y/o anti-La/SS-B es equiparable al de las pacientes no portadoras. No es necesaria la monitorización de los anticuerpos, basta con conocer su presencia o no de forma preconcepcional o en la primera visita de la gestación (1,6).

El control ecográfico fetal en estas pacientes es similar al rutinario en mujeres con LES, con la excepción de en este caso se recomienda la realización de ecocardiografía semanal-quincenal entre las semanas 16-18 y 30-34 con medición del espacio PR y de la frecuencia cardiaca fetal (1,7,11) (ver sección “Bloqueo cardiaco congénito”).

## **2. ACTIVIDAD LÚPICA.**

### **2.A ¿Qué glucocorticoides (GC) usar y a qué dosis?**

- **Se recomienda la utilización de GC no fluorados, especialmente prednisona y metilprednisolona, para el tratamiento materno durante la gestación (NE1++, GR A).**
- **Se sugiere el uso de GC orales (prednisona/metilprednisolona) preferiblemente a dosis que no superen los 20 mg/día de inicio en manifestaciones graves y 7,5 mg/día en manifestaciones leves (NE 4, GRV).**
- **Se sugiere el uso de bolus de metilprednisolona intravenosos (iv) durante la gestación en casos de actividad moderada-grave (NE 4, GR D).**

Los GC usados en el tratamiento materno son básicamente los no fluorados, de forma más específica, la prednisona y la metilprednisolona. Ambos son metabolizados por la placenta, de forma que menos de un 10% alcanzan la circulación fetal en la forma activa (12). Complicaciones propiamente maternas, como hipertensión, diabetes gestacional, osteoporosis e infecciones, así como complicaciones gestacionales como la rotura prematura de membranas (RPM) y CIR, se han relacionado con el uso de corticoterapia oral a dosis elevadas durante el embarazo (12). Debido a estos riesgos, es preciso limitar las dosis de corticoides, evitando las dosis de inicio clásicas (1 mg/kg/día) y optando por dosis de inicio inferiores, en torno a 20-30 mg/día en formas graves, tras pulsos de metilprednisolona iv, y 5-7,5 mg/día de inicio en formas leves, de manera que se alcance lo antes posible una dosis mínima basal o su suspensión completa si fuera posible. Existen datos acerca de la eficacia de pautas con dosis bajas-medias de corticoides fuera del embarazo (13–15), que consiguen una disminución en la tasa de efectos adversos y mantienen tasas de efectividad iguales o incluso superiores.

Los pulsos de metilprednisolona tienen la capacidad de producir mayores efectos antiinflamatorios e inmunosupresores que los corticoides orales (16). Fuera de la gestación, su eficacia ha sido demostrada en múltiples escenarios dentro del LES, de carácter moderado-grave, incluyendo la NL (17,18). Existen datos acerca de la utilidad equiparable de dosis menores de metilprednisolona a las utilizadas clásicamente de 1000 mg/día durante 3 días (19,20), lo cual es de especial interés en su aplicación durante la etapa gestacional. Un aspecto interesante es que la administración de pulsos de metilprednisolona iv permite una supresión de corta duración del eje hipotálamo-hipófisis-suprarrenal frente a la supresión más prolongada de dosis medias de corticoterapia oral (21). Desde un punto de vista práctico, es importante señalar que la administración de pulsos iv tiene como valor añadido una mayor reducción de la dosis subsiguiente de prednisona oral, debido a la posibilidad de un inicio a dosis menor y un descenso más rápido (16).

## **2.B ¿Qué otros inmunosupresores se pueden emplear en caso de brote y a qué dosis?**

- **Se recomienda el uso de azatioprina (AZA) fundamentalmente en brotes moderados y/o graves, a dosis menor o igual a 2 mg/kg/día (NE 2++, GRB).**
- **Se sugiere el uso de ciclosporina (NE 2++, GRB) y tacrolimus (NE 2-, GRD) en brotes moderados/graves, particularmente en casos de NL, a la menor dosis posible según niveles séricos, con monitorización de la tensión arterial, función renal y glucemia.**
- **Se sugiere el uso de inmunoglobulinas iv (IVIG) en situaciones refractarias a tratamiento inmunosupresor y/o para ganar tiempo de gestación (NE3, GRD).**
- **El uso de ciclofosfamida (CFM) está en principio desaconsejado, y sólo se sugiere en casos de actividad grave refractaria de la enfermedad con riesgo vital materno a partir del segundo trimestre (NE2+, GRC).**
- **De forma excepcional, puede considerarse el uso de rituximab en el 1<sup>er</sup> trimestre. Se desaconseja en fases más avanzadas debido al riesgo de depleción de células B en el neonato (NE3, GRD).**

A pesar de la escasa evidencia disponible al respecto, se asume que el empleo de inmunosupresores ahorradores de corticoides en la gestación tiene la misma eficacia que fuera del embarazo, permitiendo así mismo minimizar las complicaciones o daños inducidos por éstos últimos, en concreto hipertensión, diabetes gestacional, osteoporosis, infección, RPM y CIR.

En el caso de la AZA, existe evidencia de que su uso permite reducir la tasa de brotes en el LES (22) y así ayudarnos a minimizar la dosis de corticoides. Del mismo modo, el empleo de la ciclosporina fuera del embarazo permite reducir la actividad de la enfermedad, y reducir la dosis total de prednisona (23,24). Ninguno de estos fármacos han mostrado una tasa significativa de malformaciones congénitas deletéreas o eventos obstétricos adversos (25). En relación al tacrolimus, en el año 2014 se publicó una serie de casos relativos a su uso en pacientes embarazadas con NL, con resultados satisfactorios (26). Sin embargo, es necesario extremar las precauciones, ya que el control de sus niveles séricos es más complicado durante el embarazo: niveles en teórico rango terapéutico pueden resultar tóxicos, por lo que hay que tender a mantenerse en el límite bajo y utilizar la respuesta clínica y la toxicidad para ajustar las dosis (26).

Respecto a las IVIG, si bien existe escasa evidencia disponible sobre su efectividad en el LES, refiriéndose ésta sobre todo a la NL y trombocitopenia grave (27,28), constituyen un tratamiento ampliamente aceptado como terapia de rescate, de forma especial en la casos de infección activa coincidente con actividad del LES (28). Durante el embarazo, son un compuesto seguro (25). La forma de administración habitualmente recomendada es la de 0,4 g/kg/día durante cinco días consecutivos.

El uso de CFM en el embarazo está claramente relacionado con teratogenicidad, por lo que su uso está contraindicado (12,25), fundamentalmente en el primer trimestre. Existe escasa evidencia de su uso en enfermedades autoinmunes sistémicas en este contexto gestacional, limitado básicamente a series de casos. Sin embargo, en base a la experiencia de su uso en pacientes embarazadas con neoplasia (fundamentalmente de mama), se puede considerar de forma excepcional su administración en situaciones de riesgo vital materno y a partir del segundo trimestre de gestación (25,29).

En relación al uso de rituximab en brotes maternos graves durante el embarazo, la escasa evidencia disponible está relacionada sobre todo con el tratamiento de linfoma o púrpura trombocitopénica idiopática (PTI) en la madre. Los datos sobre los resultados gestacionales procedentes del Rituximab Global Safety Database nos hablan de una tasa de recién nacidos (RN) vivos del 76%, una tasa de prematuridad del 19%, un 2,2% de malformaciones congénitas mayores y un 12% de anomalías hematológicas. Un aspecto a destacar es la potencial depleción de células B en el neonato. Por este motivo, su administración en el segundo y tercer trimestres del embarazo se considera de especial riesgo, aunque también se ha descrito con su administración en el primer trimestre (25,30).

## **2.C ¿Cuáles son las diferencias en la aproximación terapéutica en función del perfil clínico?**

- **En todas las pacientes con LES, se recomienda NO SUSPENDER la hidroxicloroquina (HCQ) durante el embarazo. (NE 2++, GR B).**

El estudio observacional de *Clowse et al* (31) comparó el curso del embarazo en 3 grupos de mujeres con LES, tratadas con HCQ, no tratadas con HCQ y que suspendieron el tratamiento previamente o en el primer trimestre del embarazo. La tasa de brote fue significativamente mayor en el último grupo (55%, vs. 30% y 36%, respectivamente). Por otro lado, la seguridad de la HCQ durante la gestación está bien documentada (25).

### **Paciente serológicamente activa, clínicamente inactiva:**

- **En estas pacientes se sugiere no iniciar o intensificar el tratamiento (NE 4, GR v).**

No existen estudios que avalen el uso de GC para prevenir los brotes en la gestación. La toxicidad asociada a su uso (ver sección “¿Qué corticoides usar, y a qué dosis?”) aconseja reservar su utilización para brotes de actividad lúpica establecida.

**Brotes leves (artralgias, lesiones cutáneas lúpicas localizadas como eritema malar o lesiones discoides únicas).**

- En los brotes leves se sugiere añadir prednisona a dosis bajas (5-7.5 mg/día) al tratamiento de base con HCQ (NE 4, GR v).
- Se sugiere la reducción progresiva de las dosis de prednisona hasta alcanzar una dosis de mantenimiento menor o igual a 5 mg/día (NE4, GR v).
- Se desaconseja el tratamiento mantenido con anti-inflamatorios no esteroideos (AINE) debido fundamentalmente a los riesgos maternos de hipertensión arterial (HTA), efectos gastro-lesivos, daño renal y hepatotoxicidad con las dosis habitualmente utilizadas en la práctica clínica (NE4, GRv).
- Se sugiere evitar el uso de AINE después de la semana 30 de gestación por el riesgo de oligohidramnios y cierre del ductus arterioso (NE3, GR D).

Los AINE, si bien han demostrado ser eficaces en el tratamiento sintomático de brotes articulares leves, han sido vinculados a alteraciones en el proceso de implantación con incremento del riesgo de aborto precoz (32), así como a infertilidad transitoria (33). Por otra parte, su uso está contraindicado a partir del tercer trimestre del embarazo por riesgo de cierre prematuro del ductus arterioso, existiendo también riesgo de disminución de la perfusión renal y oligohidramnios (25). En cualquier caso, dado los riesgos maternos de HTA, gastropatía y de deterioro de la función renal con el uso crónico de AINE, parece razonable, en situaciones en las que su uso fuese requerido de forma continuada, primar la administración de prednisona a dosis bajas (<7,5 mg/día) frente a los AINE con la finalidad de reducir los efectos secundarios.

Respecto a las dosis de corticoterapia idóneas en casos de brote leve, parece razonable recomendar dosis iniciales entre 5-7,5 mg/día, ya que se consideran seguras en cuanto a evitar daño inducido por corticoides (34), están vinculadas a un menor riesgo de infecciones que dosis superiores a 7,5 mg/día (35) y a menores efectos adversos inmediatos o a corto plazo, en general, que la terapia con AINE. Por último, la dosis óptima de mantenimiento debería estar en torno a los 2,5 mg/día, con el objetivo de minimizar los efectos adversos ya expuesto en el apartado de corticoterapia.

**Brotes moderados (poliartritis, trombopenia moderada, anemia hemolítica con baja tasa de hemólisis, lesiones lúpticas extensas, pericarditis/derrame pericárdico no grave, derrame pleural, vasculitis cutánea, brote leve que no responde al tratamiento aconsejado...)**

- En el caso de brote moderado, se sugiere el empleo de pulsos de metilprednisolona 125 mg/día (de 1 a 3 días consecutivos) seguido de prednisona a dosis inicial máxima de 5-10 mg/día al día tras finalizar los pulsos (NE4, GR v).
- Si la persistencia de la sintomatología no permitiese el descenso de la dosis de corticoides, se recomienda la adición de AZA (NE 2++, GR B).
- En caso de intolerancia a AZA, se sugiere el uso de anticalcineurínicos (NE4, GR v).

La administración de pulsos de metilprednisolona en brotes moderados se sustenta en las siguientes observaciones: 1) efecto inmunosupresor mayor y más rápido que la corticoterapia oral (16); 2) posibilidad de inicio subsiguiente de corticoterapia oral a dosis más bajas (16); 3) activación preferencial de la vía no-genómica (36), con la consiguiente minimización de los efectos deletéreos inducidos por los GC con la activación de la vía genómica.

Los pulsos de metilprednisolona pueden emplearse a dosis más bajas de las habituales (en forma de minipulsos de 125 mg/día durante 3 días) para reducir el paso transplacentario del fármaco. Posteriormente se considera que la dosis oral que debe seguir a la administración de pulsos podría encontrarse entre los 5-10 mg/día inicialmente, con reducción posterior paulatina, si bien no existe evidencia que justifique específicamente la recomendación de estas dosis.

Si la persistencia de la sintomatología o su recidiva tras el descenso de la prednisona oral lo obliga, se considerará la adición de AZA como ahorrador de esteroides, como se ha expuesto previamente en el apartado sobre los inmunosupresores (22,25), a dosis máxima de 2 mg/kg/día, con el fin de lograr un descenso de la dosis de prednisona hasta 2,5 mg/día. Es importante tener en cuenta que el efecto máximo del fármaco puede demorarse al menos 3-4 semanas, así como su potencial leucopenizante y hepatotóxico, que nos obliga a realizar controles analíticos periódicos durante su

administración, si bien no existen recomendaciones específicas publicadas respecto a la monitorización del fármaco.

Otra alternativa, en casos seleccionados, es el uso de inhibidores selectivos de la calcineurina, ciclosporina y tacrolimus (23,25,26). En el ámbito del LES, no existen recomendaciones específicas respecto a las dosis iniciales, niveles objetivo ni pautas de monitorización específicas, por lo que los siguientes datos están basados fundamentalmente en la experiencia del panel de autores. Dado que ambos fármacos dado tienen capacidad de inducir HTA, nefrotoxicidad y neurotoxicidad (temblor), debemos extremar el control de los mismos mediante tomas periódicas de tensión arterial, así como la monitorización de la función renal y de los niveles plasmáticos: en el caso de la ciclosporina, sobre los 100 ng/ml, para lo cual podemos iniciar el fármaco a dosis entre los 2-3 mg/kg/día; en el caso del tacrolimus, la dosis inicial debería situarse sobre los 0,05 mg/kg/día (para su administración por la mañana en el caso de los preparados de liberación retardada, o para su división en 2 dosis separadas cada 12 horas en el caso del preparado de liberación inmediata) con el fin de alcanzar unos niveles plasmáticos sobre los 5 ng/ml. Otro aspecto a señalar en relación a estos dos fármacos es el riesgo de intolerancia a la glucosa y diabetes, de especial importancia durante la gestación.

**Brote grave (nefritis proliferativa, neumonitis lúpica, trombopenia grave, anemia hemolítica con alta tasa de hemólisis, derrame pericárdico grave, derrame pleural refractario, manifestaciones neuropsiquiátricas graves...)**

- En caso de brote grave, se sugiere el uso precoz durante 3 días consecutivos de pulsos de metilprednisolona 125, 250 ó 500 mg/día, en función de la gravedad del caso, seguida de prednisona oral a dosis máxima de 20-30 mg/día con descenso quincenal 20-15-10-7,5-5 mg/día hasta alcanzar la dosis objetivo de mantenimiento menor o igual a 5 mg/día. (NE 2-, GR v).
- Se sugiere el uso de IVIG (0,4 g/kg/día x 5 días), tras la administración de los pulsos de metilprednisolona, realizando un balance individualizado del riesgo trombótico (NE 4, GR D).

- **Se sugiere la administración desde el inicio de inmunosupresores ahorradores de corticoides (AZA, ciclosporina, tacrolimus) en el contexto de brote grave (NE4, GR V).**
- **El uso de CFM está en principio desaconsejado, y sólo se sugiere en casos de actividad orgánica grave refractaria o riesgo vital materno, a partir del 2º trimestre (NE2+, GR C).**
- **De forma excepcional, puede considerarse el uso del rituximab en el 1º trimestre. Se desaconseja en fases más avanzadas debido al riesgo de depleción de células B en el neonato (NE3, GR D).**

Al igual que ocurre fuera de la gestación, en caso de actividad grave es preciso lograr una rápida remisión, para lo cual debemos considerar el uso de pulsos de metilprednisolona iv, sin que exista un consenso sobre la dosis más apropiada, como se ha expuesto previamente en el apartado “Corticoterapia”. Teniendo en cuenta el paso del 10% de la dosis a través de la barrera placentaria, así como la evidencia existente (fuera de la gestación) de la similar eficacia de dosis más bajas a las de 1g/día durante 3 días utilizadas clásicamente, parece razonable abogar por dosis inferiores a 500 mg/día durante 3 días (19,20).

Dada la limitación de opciones terapéuticas en los casos de brotes graves, la seguridad del uso de las IVIG las convierte en una opción de tratamiento interesante. No obstante, es preciso tener en cuenta el aumento del riesgo de trombosis que supone la administración de IVIG, que en este caso se suma al riesgo trombótico ya de por sí incrementado durante la gestación, particularmente en el caso de que la paciente sea portadora de AAF. Por lo tanto, es esencial considerar el balance riesgo/beneficio de forma individualizada.

En el caso de las manifestaciones graves, dado que su naturaleza obliga a administrar un tratamiento intensivo, un aspecto prioritario debería ser la administración precoz de inmunosupresores ahorradores de GC, como ya se ha comentado.

Si la situación fuese de gravedad extrema, con riesgo vital materno (ejemplo hemorragia alveolar), podría considerarse la administración de CFM iv, después del 1er trimestre por el alto potencial teratogénico, o de rituximab, fundamentalmente en 1er

trimestre, para evitar el riesgo de depleción de células B en el neonato (ver apartado “Inmunosupresores”).

## **2.D ¿Tienen las escalas de actividad lúpica aplicabilidad/utilidad durante el embarazo?**

- **No se recomienda el uso de escalas de actividad en la práctica clínica (NE4, GR D).**

Desde el punto de vista práctico, el brote se define como un incremento en la actividad de la enfermedad, objetivable clínicamente, que puede acompañarse o no de cambios analíticos y que nos obliga a realizar un cambio en el tratamiento de base. A este respecto, es preciso recordar que existen una serie de cambios fisiológicos durante el embarazo que no debemos confundir con actividad lúpica: entre éstos se encuentran el incremento de la proteinuria (<300 mg/24h), artralgias leves como resultado de la laxitud de los ligamentos, disnea por hiperventilación fisiológica durante la gestación, anemia leve hemodilucional, trombopenia leve (>100.000) e incremento de los niveles del complemento (37,38).

Tal como ocurre fuera del embarazo, las escalas de actividad lúpica tienen su utilidad fundamental en homogeneizar la definición de brote de cara a la investigación, no en guiar nuestra actuación clínica. Por lo tanto, no son de necesaria aplicación en la práctica rutinaria. De cara a la actividad investigadora, existen 2 escalas que han sido validadas para su aplicación a mujeres embarazadas: el *modified Physician Global Assessment* (m-PGA) y el *Lupus Activity Index in Pregnancy* (LAI-P) (39,40). La primera es una sencilla escala analógica visual de 3 grados, mientras que la segunda es una herramienta más compleja que contempla parámetros clínicos, analíticos y relativos a cambios en el tratamiento. El LAI-P fue validado en un estudio con 38 gestantes con LES mostrando una sensibilidad y especificidad > 90% comparado con el m-PGA (40).

## **3. NEFRITIS LÚPICA.**

Durante el embarazo se producen una serie de cambios fisiológicos que suponen una sobrecarga para los riñones. El filtrado glomerular (FG) puede aumentar hasta el 50% y el aclaramiento de creatinina (ClCr) en torno al 30%, por lo que la creatinina (Cr) sérica

disminuye a niveles de 0,4-0,6 mg/dl. La excreción urinaria de proteínas también aumenta, siendo normales valores entre 180-250 mg/día.

Estos cambios pueden conllevar un deterioro de la función renal en pacientes con enfermedad subyacente, como la NL y aumentar el riesgo de PE (8).

La actividad renal en pacientes con lupus se puede manifestar desde el primer trimestre de gestación. Puede aparecer *de novo* o ser una recidiva de una NL previa. Las pacientes con antecedentes de NL tienen mayor riesgo de actividad de cualquier órgano durante el embarazo, especialmente renal, con un riesgo alrededor de un 20-30% en aquellas pacientes que han tenido un brote renal en un embarazo previo (41).

En las pacientes con LES, la incidencia de PE está aumentada, oscilando entre 11-35% según las diferentes series, frente al 5% de riesgo en la población general (8,41-49), por tanto, su diagnóstico y manejo precoces son de fundamental importancia tanto para la madre como para el feto.

### **3.A ¿Cómo se diagnostica la NL durante la gestación?**

- **Se sugiere utilizar los mismos criterios que en las pacientes no gestantes (NE 4, GR D):**
  - Proteinuria >0,5 g/día, ratio proteína/creatinina >0,5 o empeoramiento de la proteinuria basal (aumento de 2 g/día si proteinuria basal <3 g/día o el doble de la proteinuria basal, si previa en rango nefrótico) y/o
  - Deterioro inexplicado de la función renal (aumento de la Cr basal >30%) y/o
  - Sedimento activo (microhematuria, piuria, cilindruria)
- **Se sugiere evitar el uso del sedimento activo como marcador exclusivo de actividad renal, ya que existe un incremento de las infecciones de orina durante el embarazo (NE 4, GR D).**
- **Se sugiere realizar biopsia renal para el diagnóstico definitivo de NL (NE 3, GR D).**

Para el diagnóstico de la NL durante el embarazo, debemos utilizar los mismos criterios que en las pacientes no gestantes. La presencia de actividad extrarrenal, la positividad de los anticuerpos anti-dsDNA o aumento de su título y/o la presencia de hipocomplementemia apoyarían el diagnóstico de sospecha de NL. Hay que tener en

cuenta que en algunos casos la normalización de las cifras de complemento puede ser un indicador de actividad lúpica, ya que suele estar aumentado durante el embarazo (44,50).

El uso del ratio Pr/Cr en una muestra de orina en lugar de la excreción de proteínas en orina en 24 horas cada vez está más aceptado para la evaluación de la proteinuria en las glomerulonefritis y la PE con proteinuria >300 mg/día, aunque no ha sido validado específicamente para la evaluación en pacientes con NL durante el embarazo. La colección de orina en 24 horas parece un método más exacto aunque durante el embarazo se puede infraestimar el resultado por cambios fisiológicos, como la dilatación de los uréteres (capacidad hasta 200ml) y la dificultad para el vaciado vesical debido al aumento de tamaño del útero (8,43).

Se debe tener precaución también al utilizar fórmulas que incluyan la Cr para el cálculo del FG (como MDRD de *Modification of Diet in Renal Disease Study Equation*), ya que pueden infraestimar el resultado como consecuencia del aumento del volumen sanguíneo (8).

### **3.B ¿Se puede realizar una biopsia renal en la gestación? ¿Cuándo estaría indicada?**

- **Se sugiere realizar biopsia renal antes de las 32 semanas de gestación, en pacientes en las que no exista contraindicación, cuando la sospecha clínica no sea suficiente o no haya una respuesta adecuada al tratamiento (NE 3, GR D).**

Cuando los parámetros clínicos y de laboratorio no sean suficientes para el diagnóstico o no haya una respuesta adecuada al tratamiento debemos plantearnos la realización de una biopsia renal en aquellas pacientes en las que no exista contraindicación.

La biopsia renal se puede realizar de forma segura en aquellas pacientes con tensión arterial y coagulación normales. Aunque parece que el riesgo de complicaciones durante el procedimiento no es mucho mayor que en las pacientes no gestantes, las consecuencias de un sangrado post-biopsia pueden ser graves poniendo en peligro la vida de la madre y del feto (51).

En un revisión sistemática realizada por *Piccoli et al* (52), se objetivó una incidencia de complicaciones del 7% al realizar una biopsia renal durante la gestación, especialmente a partir de las 25 semanas (+/- 3), en comparación con el 1% en el puerperio. Entre las

complicaciones durante el embarazo se objetivaron: sangrados que precisaron transfusión, hematomas extensos, PPT y muertes fetales.

La mayoría de los autores no recomienda realizar una biopsia renal después de la semana 32, debido a una peor tolerabilidad materna por la posición que debe adoptar durante el procedimiento. En estos casos se debería plantear el riesgo-beneficio de finalizar el embarazo si la causa subyacente no está controlada, ya que el feto es viable y se podría realizar un tratamiento más agresivo en el posparto (9,42,43).

El aumento de proteinuria, la HTA o la presencia de edemas son síntomas presentes en los pacientes con NL pero también en otras entidades como la PE. En pacientes con NL previa diagnosticada por biopsia, que presentan empeoramiento de los parámetros renales, acompañado de aumento o positivización de los anticuerpos anti-dsDNA, complemento normal o disminuido o datos de actividad lúpica extrarrenal, el diagnóstico puede ser sencillo, especialmente si se manifiesta antes de las 20 semanas de gestación y en estas pacientes se puede optar por intensificar el tratamiento inmunosupresor, reservando la biopsia renal para aquellos casos que no respondan al tratamiento.

Sin embargo, en otras ocasiones los datos clínicos y de laboratorio no son suficientes para realizar el diagnóstico diferencial y en algunos casos, la NL y PE pueden coexistir, por lo que para el diagnóstico definitivo se debe realizar una biopsia renal en aquellas pacientes en las que no exista contraindicación, ya que nos va a ayudar a establecer un pronóstico y planificar el tratamiento adecuado: inducción del parto, si es posible en función de la edad gestacional, en la PE o iniciar/intensificar el tratamiento inmunosupresor en la NL.

Además, en aquellas pacientes con AAF positivos o SAF secundario, la biopsia renal va a ayudar a clarificar la presencia de microangiopatía trombótica, que puede coexistir con los cambios histológicos relacionados con la NL (43).

Las guías ACR y las EULAR/ERA-EDTA no especifican en qué contexto se debe realizar una biopsia renal durante la gestación, por lo que algunos autores como *Chen et al*, (53), sugieren que se deben aplicar los mismos criterios que en las pacientes que no están embarazadas. Según los criterios EULAR/ERA ante cualquier signo de afectación

renal, como proteinuria >0,5 g/día, especialmente si se acompaña de sedimento urinario activo y/o deterioro de la función renal no explicado por otras causas (54).

### 3.C ¿Cómo llevar a cabo el diagnóstico diferencial de la NL con la PE?

- Se sugiere realizar una biopsia renal para el diagnóstico definitivo (NE 3, GRD).
- Se sugiere la determinación de niveles de factores de complemento, anti-dsDNA y sedimento urinario y la valoración clínica como apoyo en la sospecha de NL (NE3, GRD).
- Aunque no se puede establecer una recomendación actualmente, los marcadores de angiogénesis como el ratio entre “soluble *fms-like tyrosine kinase 1* / Placental growth factor” (sFlt-1/PIGF) y/o endoglina y la medición por Doppler del índice de pulsatilidad medio en las arterias uterinas (mUtA-PI) podrían ser útiles para el diagnóstico precoz de PE en pacientes con LES y SAF (NE 2++).

Según la clasificación de la *International Society for the Study of Hypertension in Pregnancy* (ISSHP), la PE se define como: a) HTA > 140/90 mmHg y proteinuria >300mg/día en aquellas pacientes que no lo tenían de forma basal, después de la 20 SG, b) HTA no conocida y duplicación de las cifras de proteinuria en paciente con proteinuria previa pero no HTA o c) empeoramiento de la HTA (aumento  $\geq 15$  mmHg en tensión sistólica y/o diastólica) y aumento de más del doble de la proteinuria basal en pacientes con HTA y proteinuria previas (5,47). En las pacientes con LES, la incidencia de PE está aumentada, oscilando entre 11-35% según las diferentes series, frente al 5% de riesgo en la población general (9,42,47).

Como se menciona en el apartado anterior, la alteración o empeoramiento de determinados parámetros renales como el sedimento, la función renal, la tensión arterial y especialmente la proteinuria, junto con datos de actividad extrarrenal (artritis, serositis, lesiones mucocutáneas...), positivización o aumento de anti-dsDNA y normalización o disminución de los niveles de complemento son datos sugestivos de actividad renal lúpica. En la tabla 2 se presenta el diagnóstico diferencial entre NL y PE (2,8,9,42,44,45,54–63).

En la última década se han descrito marcadores de angiogénesis que se encuentran alterados en el suero de las pacientes con PE en comparación con las gestantes sanas (aumento de sFlt-1 y endoglina, disminución de PlGF y aumento del ratio sFlt-1/PlGF) (55,56). Estudios recientes han demostrado que estos marcadores se comportan también de forma diferente en las pacientes con LES y/o SAF frente a PE, pudiendo ser útiles para el diagnóstico diferencial. Un estudio realizado por *de Jesús et al* (57), en el que compara los resultados de 57 gestantes con LES con 34 gestantes sanas, muestra que el PlGF y sFlt-1 están aumentados en pacientes con LES con respecto a los controles. Sin embargo, estos marcadores no se modifican entre las pacientes con LES inactivo y las que sufren un brote durante el embarazo (incluso en aquellos con antecedentes de NL). Además, en otro estudio realizado por *Qazi et al* (58), en el que se comparó el suero de pacientes con LES que desarrollaron PE durante el embarazo frente al de pacientes con LES sin PE, se objetivó un aumento en sFlt-1 en el primer grupo frente a las pacientes que no desarrollaron esta complicación. Más recientemente, el estudio multicéntrico PROMISSE ha demostrado la utilidad de los marcadores de angiogénesis medidos desde la 12 SG como predictor precoz de efectos adversos durante el embarazo como PE, muerte fetal, CIR y PPT en una cohorte prospectiva de pacientes con LES y SAF (64).

El Doppler de las arterias uterinas se ha postulado durante muchos años como un método prometedor para la predicción de PE (59). En un estudio de 116 embarazos en pacientes con LES y SAF realizado por *Le Thi Huong et al* (60), el análisis multivariante mostró que el Doppler de arterias uterinas anormal en el segundo trimestre fue el único factor predictivo de mal pronóstico fetal (OR= 13,84; IC95%: 3,41–56,16; P=0,001) (2). Otro estudio más reciente de *Pagani et al* (61), mostró que la medición del mUtA-PI tenía una alta sensibilidad y especificidad para la predicción de PE en pacientes con LES durante el 2º trimestre del embarazo.

El uso de los marcadores de angiogénesis junto con el Doppler de arterias uterinas entre las 20-26 SG, han demostrado en diferentes estudios ser una excelente cribado para la PE temprana (<34 semanas) pero no para la tardía (59,62).

Actualmente estos procedimientos no están disponibles en todos los centros y aún requieren estudios más amplios en pacientes con LES y SAF, por lo que la biopsia renal sigue siendo la prueba que nos dará el resultado definitivo (8,63).

A diferencia de la NL, donde la histología va a ayudar a clasificar y marcar el pronóstico y tratamiento de la enfermedad, en la PE no refleja la gravedad de los síntomas, y además la endoteliosis glomerular se puede ver también en pacientes sanas (52). Por otro lado un reciente meta-análisis llevado a cabo por *Smyth et al* (48), no ha encontrado asociación estadísticamente significativa entre el subtipo histológico de la biopsia renal en las gestantes con NL (proliferativa o no) y complicaciones materno-fetales.

### **3.D ¿Cuál es el tratamiento de la NL durante la gestación?**

- En el tratamiento inicial de los brotes de NL, se sugiere el uso de pulsos de metilprednisolona (250-500 mg/día durante 3 días consecutivos) seguido de dosis de prednisona o equivalente  $\leq 30$  mg/día (NE2++, GRC).
- La pauta de descenso de esteroides se realizará como recomienda en el tratamiento de los brotes graves (ver en apartado “Actividad lúpica: brotes graves”).
- Se sugiere añadir desde el inicio aquellos tratamientos que sean compatibles con el embarazo como HCQ, AZA, anticalcineurínicos e IVIG, solos o en combinación en función de la gravedad del cuadro (NE 3, GRC).
- Se sugiere el uso de AZA como inmunosupresor de elección para el tratamiento de inducción en las NL que debutan durante el embarazo o para el mantenimiento en las pacientes con diagnóstico previo (NE3, GRC).
- Se desaconseja el uso de CFM. Sólo se sugiere su uso en casos de actividad grave refractaria o riesgo vital materno, a partir del 2º trimestre (NE2, GR D).
- Se sugiere el uso de plasmaféresis o inmunoadsorción en los casos refractarios a todas las terapias previas (NE 3, GRC).
- Los inhibidores de la enzima convertidora de angiotensina (IECA) o antagonista del receptor de angiotensina II (ARA-II) están contraindicados durante el embarazo, por

**lo que para el control de la tensión arterial se sugiere el uso de labetalol, nifedipino, metildopa o hidralacina (NE 3, GRC).**

Cuando hay un brote a nivel renal durante el embarazo, ya sea *de novo* o una recidiva, el primer paso consistiría en iniciar o aumentar el tratamiento con glucocorticoides. Aunque clásicamente se utilizaban dosis entre 0,5-1mg/kg/día, un pequeño ensayo clínico y estudios observacionales en pacientes no embarazadas apoyan iniciar la terapia con pulsos intravenosos de metilprednisolona (250-500 mg/día durante 3 días consecutivos) seguidos de dosis medias de prednisona o equivalente por vía oral (20-30 mg/día) (14,15,65,66). Esta pauta permite una disminución más rápida de los GC orales y reducir el riesgo de complicaciones materno-fetales.

Se recomienda añadir HCQ, en el caso de que la paciente no la estuviese recibiendo previamente, por su efecto adyuvante en el tratamiento de la NL, sumado a su seguridad durante el embarazo (25,50,67).

La AZA es el inmunosupresor de elección tanto para tratamiento de mantenimiento en las pacientes con NL previa como para la inducción en las que debutan durante el embarazo. Ha demostrado ser eficaz y tener un perfil seguro durante la gestación y se ha asociado con menos efectos adversos y complicaciones materno-fetales que otros inmunosupresores (25,50).

El tratamiento con anticalcineurínicos (ciclosporina y tacrolimus) también ha mostrado ser seguro durante el embarazo, aunque el tacrolimus se ha asociado con más casos de PE, diabetes gestacional e hipertensión en comparación con ciclosporina (8,45). Una serie reciente describe la evolución de 9 pacientes con nefritis durante el embarazo (6 con brote activo, 3 en tratamiento de mantenimiento), todas ellas tratadas con tacrolimus, combinado o no con AZA (26). Todas ellas alcanzaron la remisión parcial o completa. Debido al aumento del volumen sanguíneo durante el embarazo ambos deben utilizarse a la dosis mínima efectiva y se deben realizar controles de niveles séricos de forma periódica para evitar toxicidad (25). Se puede plantear su uso en combinación con AZA con una monitorización estrecha de la paciente (26).

Otra opción en las pacientes que no respondan a las terapias convencionales sería el tratamiento combinado con IVIG ya que han demostrado beneficio en pacientes con

NL refractaria no embarazadas y es un tratamiento seguro durante el embarazo (25,27,50). Hay que tener precaución ya que pueden deteriorar la función renal.

En casos excepcionales en los que haya un riesgo vital para la madre y el feto aún no sea viable, algunos autores sugieren la posibilidad de utilizar CFM en el segundo-tercer trimestre, ya que se ha visto que en estudios en pacientes con cáncer de mama no hay complicaciones fetales significativas (25). Su uso durante el primer trimestre está contraindicado debido a su alta teratogenicidad (12,25).

La evidencia actual indica que el uso de rituximab en el primer trimestre del embarazo no aumenta el riesgo de malformaciones fetales. Sin embargo, sí que hay riesgo importante de depleción de células B y citopenias en el neonato con el consecuente riesgo de infecciones, por lo que debería utilizarse sólo en casos muy excepcionales (1,25,30,68).

La plasmaféresis o la inmunoadsorción podrían utilizarse como último recurso en pacientes refractarias a todas las terapias descritas previamente y cuando el feto no sea aún viable. En un estudio multicéntrico realizado por *Derksen et al* (69) en el que comparan plasmaféresis junto con GC frente a inmunosupresores con GC no encontraron diferencias significativas en cuanto a los resultados. La plasmaféresis se podría considerar una opción terapéutica en pacientes con infecciones graves aunque paradójicamente los efectos adversos asociados a esta terapia sean las infecciones (70).

La tensión arterial debería estar controlada con agentes diferentes de los IECA o ARA-II idealmente antes de la gestación o, en su caso, ser retirados con el diagnóstico del embarazo, por su efecto en el desarrollo renal y el crecimiento fetales (71). Los diuréticos no deben emplearse en pacientes con PE u oligoamnios ya que existen evidencias de reducción del flujo placentario y depleción del volumen intravascular, que en las pacientes preeclámplicas ya está disminuido con respecto al embarazo normal. Como alternativas se pueden utilizar labetalol, nifedipino, metildopa o hidralacina, aunque hay que tener en cuenta que estos fármacos no tienen efecto antiproteinúrico. El control de la tensión arterial durante el embarazo es importante para evitar la progresión del daño renal en pacientes con NL previa. Se recomienda mantener unos niveles  $\leq 140/90$  mmHg (8,43,54).

Además, las pacientes con antecedentes de NL o con actividad renal durante el embarazo tienen mayor riesgo de desarrollar PE (44,50,54), por lo que deberían administrarse dosis bajas de aspirina (100 mg/día) antes de la 12 semana (ver más adelante sección “Defectos de placentación y complicaciones vasculares gestacionales”).

#### **4. MANEJO DE COMPLICACIONES EN GESTANTES CON SAF/AAF.**

##### **4.1 ¿Cómo tratar el SAF obstétrico durante la gestación?**

- En pacientes con SAF obstétrico e historia de abortos precoces (<10 semanas) de repetición se recomienda tratamiento con AAS a dosis bajas (NE1, GRA) con o sin heparina de bajo peso molecular (HBPM) profiláctica asociada (NE 4, GR D).
- En pacientes con SAF obstétrico e historia de muerte fetal (>10 semanas) se sugiere tratamiento con AAS a dosis bajas y HBPM a dosis profilácticas (NE4, GRD).
- En pacientes con SAF obstétrico e historia de PE grave y/o insuficiencia placentaria, se recomienda tratamiento con AAS a dosis bajas (NE 1 -, GRB) +/- HBPM en función del perfil de riesgo individual (NE4, GRD).
- Se sugiere iniciar tratamiento con AAS de forma preconcepcional (NE2++, GRC).
- En pacientes portadoras asintomáticas de AAF con perfil de alto riesgo se sugiere tratamiento con AAS (NE4, GRD).

##### **Abortos precoces de repetición (<10 semanas):**

En una revisión sistemática de la literatura (72), que incluyó 10 ensayos clínicos aleatorizados de tratamientos con AAS, HBPM + AAS, corticoides o IVIG, la tasa de RN vivos en pacientes que tomaron sólo AAS oscilaba en 7 estudios, entre el 42% y el 80%. En comparación, en 8 estudios que incluían un brazo de AAS + HBPM, la tasa de RN vivos oscilaba entre 71 y 85%. En conjunto, los autores concluyeron que la evidencia justificaba el uso de HBPM + AAS a dosis bajas en pacientes con abortos precoces de repetición y AAF, aunque indicaban que se necesitaban estudios más amplios y bien diseñados.

*Ziakas et al* (73), publicaron en 2010 un meta-análisis que estudió de forma separada los estudios que compararon AAS sola con heparina no fraccionada (HNF) (n=3) y con HBPM (n=2). Se observó una reducción significativa en la tasa de abortos tempranos con la combinación AAS + heparina no fraccionada (RR= 0,26; IC95%: 0,14-0,48), sin diferencias significativas entre AAS y AAS + HBPM en abortos tempranos ni entre ninguna de las terapias combinadas y AAS en el número de muertes fetales.

Un meta-análisis con metarregresión (74) analizó cinco ensayos clínicos aleatorizados o con asignación consecutiva de tratamiento en lo que se comparaba el efecto de añadir HBPM a AAS en mujeres con AAF y abortos precoces recurrentes. Los resultados mostraron que las pacientes tratadas con terapia combinada mostraron una mayor frecuencia de niños nacidos vivos (RR= 1,3; IC95%: 1,04-1,63), con un NNT de 5.6.

Sin embargo, pese a estos resultados cabe la crítica de que los ensayos en los que se fundamentan los tres meta-análisis tienen importantes limitaciones, sobre todo el inusual comportamiento de los brazos de AAS, en los que se observaron tasas de éxito muy inferiores a las registradas en la práctica totalidad de estudios observacionales publicados (2). Además, es llamativa la ausencia de diferencias entre el tratamiento con AAS o combinado a partir del primer trimestre. Por todo ello, no se puede recomendar de forma sólida la adición de heparina al tratamiento con AAS en todas las mujeres con SAF y abortos de primer trimestre.

### **Muertes fetales, preeclampsia e insuficiencia placentaria**

No se han realizado ensayos específicos en mujeres con SAF e historia de muerte fetal. En los metaanálisis citados en la sección previa (73,74) las mujeres con historia de muerte fetal fueron minoría (73) y no se analizaron de forma separada. Estudios observacionales del tratamiento con AAS +/- heparina muestran una mejoría pronóstica global comparados con controles históricos, si bien la discriminación entre pérdidas precoces y tardías no se lleva a cabo (72,75,76). A pesar de ello, la recomendación de los grupos de expertos es la de utilizar tratamiento combinado con AAS + heparina en mujeres con SAF y muerte fetal (7,72).

Un pequeño ensayo clínico no encontró diferencias significativas en cuanto a PE o peso neonatal en dos grupos de 16 mujeres con historia de prematuridad <34 semanas de gestación por trastornos hipertensivos del embarazo y/o CIR, junto con positividad de AAF en dos ocasiones, uno tratado con AAS y otro con la combinación AAS + dalteparina desde la semana 12 (77). De hecho solo dos pacientes en el estudio presentaron complicaciones obstétricas. Si bien la mayoría de las participantes tenían títulos de aCL inferiores a 20 GPL/MPI y menos del 30 eran positivas para AL, este estudio ratifica de algún modo los resultados de estudios en población general sobre la gran eficacia de la AAS para prevenir la PE en mujeres de alto riesgo (ver más adelante sección “Defectos de placentación y complicaciones vasculares gestacionales”). En este mismo sentido, las guías ACCP (*American College of Chest Physicians*) (78) y BCSH (*British Society for Haematology*) (79) recomiendan AAS en monoterapia en mujeres con SAF e historia de PE y/o insuficiencia placentaria. Sin embargo, los grupos de expertos recomiendan tratamiento combinado de forma generalizada en todas las mujeres con SAF obstétrico sin discriminación (7). En este sentido, parece razonable que sea el médico responsable el que decida la asociación de heparina en el escenario de SAF y PE y/o insuficiencia placentaria previa teniendo en cuenta factores como la edad materna, el curso y tratamiento del embarazo previo y la presencia de factores de riesgo adicionales en el embarazo actual, incluyendo la monitorización Doppler de la circulación materno-fetal.

En cuanto a la dosis y el momento de inicio de la terapia con AAS, la recomendación en la población general de alto riesgo de PE de acuerdo con una revisión sistemática reciente son 100-150 mg/d y previamente a la semana 16 (80). Sin embargo, en pacientes con SAF se suelen generalizar los resultados del estudio observacional de 77 embarazos en 56 mujeres con SAF de *Carmona et al* (81) que analizaron factores asociados con un pronóstico adverso del embarazo. En el modelo multivariante final, el tratamiento preconcepcional con AAS se asoció con una mayor probabilidad de éxito.

### **Portadoras asintomáticas de AAF**

Una reciente revisión sistemática no ha encontrado evidencia de que la administración de AAS mejore el pronóstico obstétrico en mujeres con AAF sin historia obstétrica

adversa previa (82). Sin embargo, es muy probable que muchas de las pacientes incluidas en los estudios analizados tuvieran perfiles de AAF de bajo riesgo. Por ello, considerando la baja toxicidad del AAS, la mayoría de autores sugieren la administración de AAS a dosis bajas en todas las portadoras de AAF de alto riesgo (83), por su potencial efecto beneficioso en las pérdidas embriofetales y la PE.

#### **4.2. ¿Cómo tratar un SAF obstétrico refractario?**

- **En las pacientes con abortos de repetición y/o pérdidas fetales refractarias a tratamiento con AAS + HBPM se sugiere añadir al tratamiento HCQ durante la totalidad del embarazo (NE 2+, GRC) o prednisona a bajas dosis durante el primer trimestre (NE 2+, GRC).**
- **No se recomienda el uso inicial de IVIG y plasmaféresis, si bien podría considerarse en ausencia de respuesta a otros tratamientos (NE 2, GRv).**
- **En casos de CIR y/o PE precoz grave, se sugiere el uso de pravastatina 20mg/día desde el diagnóstico de la PE (NE 2+, GRC).**

No existen estudios en los que aumentar las dosis de HBPM profilácticas a terapéuticas hayan demostrado mejorar los resultados gestacionales (84).

La HCQ es segura durante la gestación (25). En un estudio multicéntrico europeo retrospectivo de casos y controles (85) de 30 pacientes con SAF con 35 gestaciones tratadas con HCQ además del tratamiento convencional, las pérdidas fetales disminuyeron significativamente de un 81% a un 19%. En dicho estudio, 14 pacientes con SAF obstétrico refractario, todos ellos con pérdidas fetales previas bajo tratamiento, la adición de HCQ resultó en 11/14 RN vivos, un 78% de los casos.

En un estudio retrospectivo de 18 gestantes con pérdidas fetales asociadas a AAF y refractarias a tratamientos previos, el tratamiento con dosis bajas de prednisolona (10 mg/d) durante el primer trimestre mostró una reducción de las pérdidas gestacionales de un 30% a un 9% (86).

En una revisión sistemática reciente sobre el tratamiento con IVIG en SAF (87) se incluyeron 35 estudios (14 casos clínicos, 9 series de casos y 12 ensayos clínicos, 3 de

ellos randomizados). Se concluyó que las IVIG se asociaban con un riesgo aumentado de pérdidas fetales o prematuridad respecto al tratamiento con HBPM + AAS. La Guía de Práctica Clínica sobre LES de GuíaSalud del Ministerio de Sanidad (2) desaconseja la utilización de IVIG para el tratamiento de las manifestaciones obstétricas del SAF. Un estudio observacional de 18 embarazos en 14 mujeres con SAF, todas ellas con historia de trombosis y/o de complicaciones obstétricas graves (en 9 casos a pesar de tratamiento convencional), recibieron tratamiento combinado con plasmaféresis / inmunoadsorción combinada con IVIG, junto con AAS y HBPM, hasta el parto (88) La tasa de nacimientos vivos fue del 94%. Tres mujeres presentaron PE (2 leves, una grave) y una desarrolló un SAF catastrófico en el puerperio. Sin embargo, consideramos que, dado lo limitado de la evidencia, la complejidad del tratamiento y sus potenciales efectos secundarios durante el embarazo, esta opción debe reservarse de forma excepcional para situaciones en las cuales todas las otras modalidades terapéuticas hayan fracasado y después de una estricta valoración riesgo/beneficio.

En una serie reciente (89) se evaluaron 21 gestantes que desarrollaron PE precoz grave y/o CIR con AAS + HBPM. Diez de ellas recibieron el tratamiento habitual (AAS + HBPM profiláctica), mientras que 11 recibieron además pravastatina 20 mg/d al inicio de la PE y/o el CIR. En el grupo control sobrevivieron 6/11 neonatos y 3 de ellos con anomalías del desarrollo. Las gestantes que recibieron AAS + HBPM + pravastatina presentaron todas ellas RN vivos en la semana 34 o posterior de la gestación, mejorando el flujo uteroplacentario y la PE ya desde el 10º día de tratamiento con pravastatina. Este estudio sugiere que la pravastatina administrada al inicio de la PE o CIR puede mejorar los resultados gestacionales en estas pacientes.

#### **4.3 ¿Cómo tratar la trombopenia en gestantes con SAF/AAF?**

- **En pacientes gestantes con SAF y trombopenia, se sugiere tratar de forma similar a la trombopenia por LES (NE 3, GRD).**

Muchas pacientes gestantes con SAF tienen cifras de plaquetas por debajo de 100.000/ $\mu$ L. Se produce por anticuerpos patogénicos contra glicoproteínas de membrana, distintos a los AAF. Las pacientes se deberían tratar igual que en el caso de

trombopenias autoinmunes con corticoides, IVIG y/o AZA +/- calcineurínicos (ver tratamiento de manifestaciones del lupus en la gestación). En casos de trombosis previa, es preciso un balance adecuado entre el riesgo de trombosis y de hemorragia, sobre todo en pacientes con recuentos plaquetarios  $<50.000/\mu\text{L}$  (90). Se recomienda no utilizar dexametasona durante la gestación (91).

En pacientes con LES y SAF y/o sangrado sintomático, se recomienda tratamiento con corticoides (preferiblemente prednisona o metilprednisolona) e IVIG. En casos resistentes se puede utilizar azatioprina. No existen datos sobre el riesgo de trombosis y los beneficios de la anticoagulación en gestantes con trombopenia y AAF sin historia previa de trombosis. Se recomienda AAS a dosis bajas en estos casos con cifras de plaquetas  $>50.000/\mu\text{L}$  y en casos de abortos o trombosis previa, se recomienda asociar HBPM. Por analogía a las gestantes con trombopenia autoinmune, la anticoagulación se considera segura con plaquetas por encima de  $50.000/\mu\text{L}$  (92).

#### **4.4 ¿Cómo manejar la trombosis en las gestantes con SAF/AAF?**

- **Se recomienda la HBPM frente a la HNF (NE1++, GR A).**
- **Se recomienda utilizar HNF, fondaparinux, danaparoides, los filtros de vena cava y la trombolisis en situaciones especiales o contraindicación para HBPM (NE 2++, GRB).**
- **No se recomiendan los nuevos anticoagulantes orales ya que no existen estudios sobre ellos en gestación (NE3, GRC).**
- **Se sugiere mantener la anticoagulación durante toda la gestación y hasta 6 semanas posparto en mujeres sin AAF o indefinida si los AAF son positivos (NE4, GRD).**

En las guías clínicas ACCP 2012 (78) para gestantes que precisen anticoagulación para el tratamiento de enfermedad tromboembólica venosa (ETV), se recomienda HBPM sobre antagonistas de vitamina K durante el primer trimestre de la gestación (GR 1A), el segundo y tercer trimestre (GR 1B) y a final de la gestación, cuando el parto es inminente (GR 1A). Se prefieren las HBPM a la HNF porque su farmacocinética es más fiable, su administración y posología más fácil y porque la trombopenia inducida por heparina y el riesgo de osteoporosis son menores con las HBPM. No hay evidencia sobre la superioridad de un tipo de HBPM sobre otra. Estas recomendaciones se basan

en una revisión sistemática de 64 estudios con 2777 gestaciones bajo tratamiento con HBPM (93). En ella se observa una baja incidencia de sangrado grave (1,98%), retrombosis a pesar de tratamiento con HBPM (1,37%), reacciones alérgicas (1,80%), osteoporosis (0,04%) y no se produjeron casos de trombocitopenia inducida por heparina. Se concluyó que su uso era seguro y eficaz, sin muertes maternas atribuibles a la HBPM. En un estudio retrospectivo con tinzaparina en 1267 gestaciones, se observaron sangrados relacionados con tinzaparina en un 9,9% de las gestaciones y un bajo porcentaje de trombosis (94).

Si existe una sospecha clínica fundada de ETV en la gestación, las guías ACCP recomiendan iniciar anticoagulación con HBPM, siempre que no haya contraindicación (tabla 3), en espera de pruebas diagnósticas de confirmación (78).

Junto con el posparto, el periodo siguiente al diagnóstico e inicio de tratamiento de la ETV en la gestación se considera como el de mayor riesgo de sangrado y retrombosis, por lo que en algunos estudios recomiendan ingreso hospitalario o control estricto durante las 2 primeras semanas para monitorizar a la paciente (95). Otros estudios relacionan la duración del ingreso hospitalario con el riesgo de trombosis (4 veces mayor si es menor de 3 días, 12 veces mayor para ingresos de  $\geq 3$  días) (96).

En cuanto a la duración de la anticoagulación en ETV en la gestación, algunas guías (97,98) recomiendan mantener la anticoagulación un mínimo de 3 meses. En otras (99) se recomienda mantener la anticoagulación 6-8 semanas en caso de trombosis venosa profunda (TVP) distal aislada y hasta 6 meses en caso de TVP proximal o embolismo pulmonar. Todas estas guías recomiendan, sin embargo, mantener la anticoagulación durante toda la gestación y al menos hasta 6 semanas postparto. En otros trabajos se sugiere mantener anticoagulación con HBPM a dosis terapéuticas durante 3 meses y posteriormente pasar a dosis intermedias o profilácticas hasta 6 semanas postparto (98).

La HNF sería la opción preferida para mujeres con insuficiencia renal ( $\text{GFR} < 30$  ml/min), en las que se precise trombolisis o intervención quirúrgica, alto riesgo de sangrado y en gestaciones próximas a parto programado, para facilitar la analgesia periparto debido a su corta vida media y neutralización efecto anticoagulante con sulfato de protamina (98).

Existen pocos datos sobre el uso de fondaparinux o danaparoide en gestación y en lactancia por lo que su uso en gestantes se debería limitar a pacientes con trombopenia inducida por heparina o reacciones alérgicas a heparina y siempre bajo el auspicio del especialista (100).

Debido a la escasez de datos en humanos respecto a la seguridad de los anticoagulantes directos (DOAC) en gestación y lactancia, estos fármacos no deberían utilizarse por ahora en estas poblaciones (73,101). Existen guías recientes sobre el manejo de estos medicamentos en pacientes en edad fértil o con gestación no intencionada (102). En estas guías establecen las siguientes recomendaciones:

- Las mujeres en edad fértil deberían recibir información escrita antes de iniciar tratamiento con DOAC.
- En caso de deseo de gestación, el DOAC debería sustituirse por un anticoagulante alternativo antes de la concepción, generalmente los antivitamina-K (para cambiar a HBPM en cuanto se consiga la gestación y siempre antes de la 6ª semana de gestación) o HBPM, sabiendo que esta opción puede suponer inyecciones subcutáneas prolongadas, hasta conseguir la gestación.
- En mujeres con gestación no intencionada bajo tratamiento con DOAC, éste debería suspenderse inmediatamente e iniciar HBPM.
- La exposición inadvertida a DOAC no constituye por sí misma una causa médica para terminación de la gestación.
- En mujeres con gestación bajo tratamiento con DOAC y que deciden continuar con el embarazo, debería haber un seguimiento obstétrico precoz y monitorización fetal.
- Las mujeres que estén dando lactancia no deberían tratarse con DOAC.

Las mismas guías de práctica clínica recomiendan la inserción de filtros de vena cava inferior (97,101) sólo en situaciones específicas:

- Tromboembolismo agudo con contraindicación para anticoagulación debido a riesgos de sangrado.
- Tromboembolismo recurrente a pesar de anticoagulación.
- Gestantes con ETV mayor (tromboembolismo pulmonar o trombosis de vena ilíaca) en

periodo anteparto (2-4 semanas), particularmente si se plantea una prolongada interrupción de anticoagulación.

En cuanto a la trombolisis, debido a los riesgos significativos en la gestación, las guías existentes recomiendan limitar su uso a embolismos pulmonares masivos con riesgo vital o TVP con riesgo de pérdida de un miembro (97). Se recomienda valorar la trombolisis en equipo multidisciplinar que incluya obstetras, hematólogos y/o neumólogos, intensivistas y cirujanos cardiotorácicos. Se debería aconsejar cuidadosamente a las pacientes sobre riesgos y beneficios, aunque puede ser difícil en situaciones críticas por tiempo y gravedad.

#### **4.5 ¿La administración de HBPM a dosis terapéuticas debería hacerse cada 12 o cada 24h?**

- **No existe suficiente evidencia para recomendar una u otra pauta (NE 2+, GRC).**
- **Se sugiere utilizar HBPM cada 24h debido a su posología favorable (NE4, GRV).**

Dado que la gestación se asocia con un aumento de peso, volumen plasmático y una elevación en el aclaramiento y volumen de distribución de la enoxaparina, no está claro si la posología de HBPM una vez al día es suficiente en estas pacientes.

Un estudio prospectivo observacional con un 66% de los pacientes en tratamiento con HBPM una vez al día, no detectó exceso de recurrencias de ETV (103). Dos estudios con tinzaparina una vez al día en gestación tampoco identificaron ninguna recurrencia de ETV (104,105). Sin embargo, algunas guías recomiendan una posología inicial de HBPM cada 12h en pacientes de alto riesgo, especialmente en el primer mes de tratamiento tras un embolismo pulmonar o una TVP mayor (101).

Las guías del *Royal College of Obstetricians and Gynaecologists* (97) recomiendan ajustar las dosis de HBPM al peso de la gestante al inicio de la gestación. No encuentran suficiente evidencia para recomendar dosis de HBPM una o dos veces al día y sugieren que debería haber guías locales claras para la dosificación de HBPM. En cuanto a las guías ACCP (78) recogen que estudios observacionales no han demostrado mayor riesgo de recurrencias en las pautas posológicas de una vez al día versus 2 veces al día.

#### **4.6 ¿Se debe realizar analítica tras inicio HBPM a gestantes con SAF/AAF?**

- **No existe suficiente evidencia para recomendar la determinación analítica en gestantes que inician tratamiento con HBPM (2++, B).**

El riesgo de trombopenia inducida por heparina durante la gestación es bajo (aproximadamente 1/4000 gestaciones), por lo que las guías actuales no recomiendan recuento plaquetario de rutina. La realización de recuentos plaquetarios cada 2-3 días entre los días 4 y 14 se recomienda en gestantes en situación posoperatoria con HNF durante más de 5 días (106, 107) y en pacientes que hayan recibido previamente tratamiento con HNF.

#### **4.7 ¿Cómo debemos realizar el paso a HBPM en gestantes con SAF y tratamiento previo con anticoagulantes orales anti-vitamina K?**

- **Se sugiere sustituir los anticoagulantes orales anti-vitamina K por HBPM cuando el test de gestación sea positivo, recomendándose su realización frecuente para evitar detectar el embarazo más allá de la 6ª-8ª semana desde la fecha de la última regla (NE2+, GRC).**

Las guías ACCP (78) recomiendan la sustitución de los antagonistas de la vitamina K por HBPM. Grupos de expertos recomiendan realizar pruebas de embarazo en la primera falta o frecuentes en los casos de menstruaciones irregulares, y sustituir los anti-vitamina K por HBPM cuando sea positivo frente a la sustitución antes de producirse la gestación (72). La primera opción asume que los anti-vitamina K son seguros durante las primeras 4-6 semanas de gestación (2 estudios con 125 y 235 RN con sustitución a la 6ª y 8ª semana no mostraron ningún caso de embriopatía). La opción alternativa (sustituir los anti-vitamina K por HBPM mientras se intenta conseguir la gestación) minimiza los riesgos de embriopatía asociada a los anti-vitamina K, pero prolonga la duración de exposición a heparina, con las consiguientes incomodidad, posibilidad de reacciones adversas y coste.

#### **4.8 ¿Se debe realizar monitorización factor Xa a gestantes con SAF y/o AAF + en tratamiento con HBPM?**

- **No se recomienda monitorizar actividad factor Xa (NE 2, GRB).**

En las guías clínicas de tratamiento antitrombótico ACCP 2012 (78) para tratamiento y prevención de la ETV no se recomienda la monitorización rutinaria de los niveles de anti-Xa por:

- la ausencia de estudios con suficiente número de pacientes.
- la ausencia de estudios que demuestren que los ajustes de dosis de HBPM mejoren la seguridad o eficacia del tratamiento.
- la falta de exactitud, reproducibilidad y la falta de correlación con el riesgo de sangrado o recidivas.
- el coste de la prueba en la monitorización de rutina de los niveles de anti-Xa.

En otras guías clínicas (108) no se recomienda monitorización de rutina de anti-Xa en ETV asociada a gestación, aunque se sugiere considerarla en algunas situaciones como insuficiencia renal o con pesos extremos (<50 kg o >90 kg). En la guía canadiense de ETV y gestación (98) sugieren considerar la monitorización del anti-Xa en el primer mes de tratamiento de una TVP proximal o embolismo pulmonar, con un objetivo de 0,6-1,0 U/ml 4h posinyección.

### **5. ANTICUERPOS ANTI-RO/ ANTI-LA Y BLOQUEO CARDÍACO CONGÉNITO (BCC).**

#### **5.1 ¿Debemos tratar con HCQ a todas gestantes Anti-Ro+?**

- **Durante el embarazo, se sugiere utilizar HCQ en las mujeres con anticuerpos anti-Ro/anti-La positivos, ya que puede reducir el riesgo de BCC (NE 2+, GRC).**

El paso trasplacentario de anticuerpos maternos anti-Ro y/o anti-La puede inducir inflamación, fibrosis y calcificación del tejido de conducción cardíaco del feto en desarrollo, originando una alteración en la conducción de la señal en el nodo auriculoventricular (AV), condición conocida como bloqueo cardíaco congénito fetal

autoinmune (BCC) (109). Otras complicaciones cardíacas graves (fibroelastosis endocárdica, insuficiencia valvular) pueden presentarse más raramente, incluso en ausencia de bloqueo cardíaco. El riesgo de BCC en madres portadoras de estos autoanticuerpos es de un 1,7-2% (110,111), aumentando a un 15% en caso de antecedente de lupus neonatal no cardíaco, a un 18% en caso de un hijo previo con BCC y llegando al 43% tras dos hijos afectados (112,113). La mortalidad asociada al BCC es del 20%, y un 65% de los niños que sobreviven necesitarán un marcapasos (114,115). Dos estudios han mostrado un efecto protector de la HCQ en el desarrollo de bloqueo cardíaco congénito (BCC) en pacientes portadoras de anticuerpos anti-Ro (con y sin LES asociado) y que habían presentado esta complicación en una gestación previa (116,117). Un estudio retrospectivo posterior también ha encontrado una reducción de las tasas de BCC en mujeres que recibían HCQ (frente a no tratadas), en un grupo de 33 pacientes de las que solo 2 habían presentado un embarazo previo complicado por BCC (118). Teniendo en cuenta su seguridad en el embarazo y el demostrado beneficio tanto en el lupus en general como durante la gestación, las guías más recientes recomiendan el tratamiento con HCQ de pacientes con anti-Ro y/o anti-La incluso en la primera gestación o sin antecedentes de BCC en gestaciones previas (1,7,41). Sin embargo, está por ver la eficacia real de esta medida en la disminución de la incidencia de esta grave complicación.

## **5.2 ¿En qué momento sería recomendable iniciar el tratamiento con HCQ?**

- **Se sugiere iniciar el tratamiento con HCQ previo al embarazo, cuando comience el intento de gestación (NE 4, GR√).**

En los estudios de cohortes que han demostrado un efecto beneficioso de la HCQ en la prevención de BCC, las pacientes recibían la medicación previamente al inicio del embarazo en la mayoría de los casos, ya que estaba prescrita por la enfermedad autoinmune de base (117,118).

## **5.3 ¿Cómo monitorizar la afectación cardíaca en gestantes anti-Ro+?**

- **En mujeres embarazadas con anticuerpos anti-Ro y/o anti-La positivos se sugiere realizar despistaje de BCC con ecocardiografía-Doppler, cada 2 semanas desde la semana 16-18 hasta la 30-34 de la gestación (NE 4, GRD).**
- **En mujeres embarazadas con anticuerpos anti-Ro y/o anti-La positivos y con antecedente de BCC o lupus neonatal previo, se sugiere realizar despistaje de BCC con ecocardiografía-Doppler, semanalmente desde la semana 16 a la 26 de la gestación, y cada 2 semanas posteriormente hasta la semana 34 (NE 4, GRD).**

El paso trasplacentario de autoanticuerpos maternos a la circulación fetal ocurre desde la semana 16 hasta la 30, periodo durante el cual el tejido cardíaco fetal es susceptible de ser dañado. La monitorización cardíaca fetal tiene como objetivo detectar anomalías fetales precoces, que puedan preceder al desarrollo de un bloqueo AV completo, y sean susceptibles de tratamiento (115). Los primeros signos de BCC pueden detectarse durante las semanas 18 a 24 de gestación (111), por ello se suele recomendar control ecocardiográfico fetal semanalmente desde la semana 16-18 hasta la 26-28, y posteriormente con periodicidad quincenal hasta la semana 34 (7,41).

Sin embargo, la baja prevalencia de esta complicación y la ausencia de una pauta terapéutica claramente eficaz han puesto en duda la rentabilidad de la monitorización sistemática en toda madre portadora de anticuerpos (7,118). Por otra parte, existen dudas respecto a la capacidad de diagnosticar precozmente bloqueos avanzados, al haberse encontrado casos precedidos de ecocardiograma normal sin bloqueo de primer grado la semana previa a su detección (119). Sí parece haber situaciones donde el riesgo de BCC está especialmente aumentado, y que justificarían una mayor supervisión (120): mayor riesgo con diagnóstico materno de Síndrome de Sjögren primario (2,9%), seguido de conectivopatía indiferenciada (2,3%) y LES (1%); mayor riesgo en caso de triple positividad de autoanticuerpos: Ro52, Ro60 y La o títulos elevados (121); en caso de coexistencia de anticuerpos e hipotiroidismo (122); de anticuerpos y déficit de vitamina D (123) y sobre todo con el antecedente de un hijo previo con BCC, donde el riesgo es del 18%, o de lupus neonatal sin implicación cardíaca, con un riesgo del 15%.

Aunque la utilidad de esta monitorización seriada para detectar la progresión de la inflamación miocárdica o del sistema de conducción no ha sido probada, basados en

que el potencial beneficio supera a los riesgos, la Asociación Americana de Cardiología considera indicada la monitorización seriada en mujeres con anticuerpos y un hijo previo afectado, y aunque no indicada, sí razonable en mujeres con anticuerpos en ausencia de antecedente de hijo afectado (124).

La técnica diagnóstica más extendida para la detección de BCC es la ecocardiografía con Doppler pulsado (125): el intervalo PR se calcula midiendo el tiempo desde el inicio de la onda A mitral (sístole auricular) hasta el inicio del trazado del Doppler pulsado aórtico (sístole ventricular), dentro del mismo ciclo cardiaco ventricular izquierdo. Un problema importante es la ausencia de definición de bloqueo de primer grado, estableciéndose diferentes umbrales para el diagnóstico en unos estudios y en otros: el estudio PRIDE utiliza como umbral 150 ms (119), mientras que otros estudios han empleado umbrales inferiores (126).

Existen otras técnicas de diagnóstico que se han comenzado a utilizar. La cinetocardiografía fetal Doppler tisular podría mejorar la detección precoz de BCC (127): comparada con la ecocardiografía Doppler pulsado ha mostrado una mayor precisión en la detección de bloqueo AV de primer grado en el único estudio comparativo realizado (128). La electrocardiografía transabdominal fetal constituye otro método que podría ser superior al ecocardiograma Doppler, pero se encuentra raramente disponible (123).

#### **5.4 ¿Cuáles serían las pautas de tratamiento en gestantes anti-Ro+ con bloqueo cardíaco fetal grado I, II, III o fibroelastosis/hidrops fetal?**

- En la primera determinación de un BC de primer grado, no se recomienda tratamiento. En el caso de BC de primer grado persistente, se sugiere individualizar el uso de GC fluorados y no se recomienda el uso prolongado de dosis altas (NE 3, GR<sup>✓</sup>).
- Se sugiere el uso de GC fluorados en casos de bloqueos cardíaco de 2º grado o de 3er grado asociado a hidrops fetal (NE 2+, GRC).
- En casos particularmente graves, se sugiere plantear la terapia combinada con GC, IVIG y/o plasmaféresis (NE 3, GRD).

- **No se recomienda tratamiento con IVIG, ya que no se ha demostrado su eficacia (NE 2+, GRC).**

No existen pautas establecidas respecto al manejo del BCC. La identificación de un bloqueo de primer o segundo grado supone una ventana de oportunidad para prevenir un bloqueo completo permanente, si se emplean medidas que detengan la inflamación del tejido de conducción antes de que se produzca la fibrosis.

El uso de GC fluorados, capaces de atravesar la placenta y, por tanto, eficaces en el feto, ha sido la medida más utilizada. Sin embargo, existen en el momento actual controversias respecto a su utilidad: tras las primeras comunicaciones del efecto favorable de este tratamiento en casos de BCC, miocardiopatía, fibroelastosis endocárdica e hidrops fetal (126,129–134), este efecto beneficioso no ha podido demostrarse ni los ensayos clínicos ni en las grandes series (135–137). El estudio PRIDE (119) no mostró beneficio con el uso de dexametasona para revertir el BCC de tercer grado o la no progresión del BCC de segundo a tercer grado. *Eliasson et al* (135) en un estudio retrospectivo, multinacional, multicéntrico de 175 pacientes no encontró diferencias significativas en la supervivencia fetal de los productos tratados o no con GC fluorados, independientemente de la dosis, del grado de BCC y/o la presencia de anticuerpos anti-Ro. En el trabajo de *Levesque et al* (136) el uso de esteroides fluorados no se asoció a una mayor supervivencia ni a regresión de los bloqueos de 2º grado. Finalmente *Izmirly et al* (137) no encuentra beneficio en el uso de GC fluorados en la prevención de enfermedad más allá del nodo AV, en la mortalidad ni en la prevención de la implantación de marcapasos.

Pese a todo, existe unanimidad en la conveniencia de iniciar tratamiento en casos de bloqueo de segundo grado y de primer grado cuando existan datos de inflamación miocárdica, como regurgitación tricuspídea o aumento de la densidad ecográfica (138), siempre haciendo un balance con los potenciales efectos secundarios de la medicación (139).

Respecto a los bloqueos de primer grado en ausencia de otros datos de inflamación miocárdica, no está clara la actitud a tomar: por un lado existen datos que confirman la normalización espontánea de la conducción AV en un elevado número de casos (126,140). Por otro lado, se debe tener en cuenta el potencial riesgo de toxicidad

materna (infección, osteoporosis, osteonecrosis, diabetes) y fetal (CIR, oligohidramnios) de los GC fluorados. El beneficio para el feto debe estratificarse de acuerdo a los factores de riesgo de desenlaces adversos (12).

Con los datos actualmente disponibles, parece claro que no existe tratamiento para los fetos con bloqueo de tercer grado (141,142).

Ninguno de los estudios realizados utilizando IVIG en monoterapia ha mostrado beneficio (143–145).

Varios pequeños estudios observacionales, englobando un total de 15 pacientes, han explorado la utilidad del tratamiento combinado con dexametasona 4 mg/d, IVIG (1 g/kg cada 15 d) y plasmaféresis semanal hasta el nacimiento. En 6 casos de BCC de segundo grado se han observado diferentes grados de respuesta, con estabilización, reversión a primer grado o normalización de la conducción, si bien en otros 2 el bloqueo progresó a tercer grado (146–149). En ninguno de los bloqueos de tercer grado se observó mejoría (141). Sin embargo, hay que tener en cuenta el escaso número de pacientes, que esta pauta no fue precedida de corticoides en monoterapia (es decir, que algunos casos podían haber respondido igualmente a un tratamiento menos agresivo) y los potenciales efectos secundarios. Por tanto, esta pauta solo debería considerarse en situaciones excepcionales.

- **Se sugiere no mantener tratamiento con dosis altas de GC desde el diagnóstico del BCC hasta el final del embarazo (NE 4, GR√).**

Respecto a las pautas de tratamiento, no existe ningún tipo de consenso: lo más utilizado es una dosis de 4 – 8 mg/día de dexametasona o betametasona 6 mg IM. La duración del tratamiento es variable, si bien muchos autores recomiendan mantenerlo hasta el final del embarazo, hasta detectarse mejoría clínica o hasta la aparición de complicaciones secundarias al tratamiento (124). Sin embargo, la elevada morbilidad fetomaterna asociada al uso de dosis altas de GC hace razonable el uso de pautas recortadas (12). Para disminuir el riesgo de insuficiencia suprarrenal en el RN, algunos autores reducen la dosis a partir de la semana 30 de gestación (130).

- **No hay datos que permitan recomendar el uso de dexametasona frente a betametasona, pueden utilizarse indistintamente (NE 2+, GRC)**

En términos de eficacia, no parecen existir diferencias entre el uso de dexametasona y betametasona, si bien un meta-análisis separado de datos incluidos en una revisión Cochrane mostró una reducción de la mortalidad neonatal solamente con el uso de betametasona y no con dexametasona (150). En cuanto a seguridad a corto plazo, otra reciente revisión Cochrane (151) muestra resultados similares con ambos fármacos, aunque el riesgo de sangrado cerebral fue inferior con dexametasona, así como el tiempo de estancia en cuidados intensivos neonatales. A medio plazo, la betametasona podría tener un mejor perfil de seguridad (152,153).

## **6. DEFECTOS DE PLACENTACIÓN Y COMPLICACIONES VASCULARES GESTACIONALES.**

### **6.1. ¿A quién y cuándo hay que hacer screening de riesgo de PE?**

- **Se recomienda realizar el screening de PE a toda gestante al inicio del embarazo, investigando la presencia de factores de riesgo tanto previos al embarazo como gestacionales (NE 1++, GR A).**
- **Se recomienda utilizar una combinación de diferentes factores de riesgo, como características maternas, antecedentes obstétricos y marcadores bioquímicos y biofísicos, incluyendo Doppler uteroplacentario, para el cálculo de riesgo específico de PE (NE1++, GR A).**
- **Se sugiere considerar la positividad para AAF (con o sin lupus) y la presencia o historia previa de NL como factores suficientes para inicio de profilaxis de PE, por lo que el screening podría no ser necesario en esas mujeres (NE2+, GR C).**
- **Se sugiere limitar la consideración como grupo de riesgo de PE a aquellas gestantes con determinaciones repetidamente positivas de AAF, particularmente a las portadoras de anticoagulante lúpico y/o dobles o triples positivas (NE2+, GR C).**
- **Se sugiere no considerar el LES inactivo sin historia de nefritis como un factor de riesgo a la hora de calcular el riesgo de PE (NE2++, GR B)**

El enfoque tradicional para el cribado de la PE se basa en la evaluación de las características de la madre (etnia, peso, estatura...) y su historia médica y obstétrica. Dos métodos comunes utilizados para identificar a las mujeres con alto riesgo de desarrollar PE son los recomendados por el NICE (4) y el Colegio Americano de Obstetras y Ginecólogos (ACOG) (5). En la guía NICE se recomienda la identificación del grupo de alto riesgo sobre la base de 10 factores, incluidas las características de la madre y las características de las historias médicas y obstétrica, consiguiendo una detección de aproximadamente el 40% de los casos de PE precoz y el 33% de los casos de PE a término (4). El ACOG recomienda el uso de AAS en caso tener alguno de los siguientes 10 factores de riesgo: nuliparidad, IMC>30, edad >40 años, diabetes mellitus, lupus o trombofilia, antecedentes familiares o personales de trastorno hipertensivo del embarazo, HTA crónica (5), atribuyendo el mismo valor predictivo a todos los factores y dando como resultado que se debería tratar a casi dos tercios de la población (154). Los factores más utilizados para el cálculo de riesgo de PE son: antecedente de PE (particularmente si grave precoz), la existencia de HTA crónica, nefropatía, diabetes tipo 1 ó 2, enfermedad autoinmune (LES o SAF), nuliparidad y embarazo gemelar (4).

En los últimos años, numerosos estudios han demostrado que distintas combinaciones de factores de riesgo de PE (historia clínica materna, junto con marcadores biofísicos como índice de pulsatilidad de arterias uterinas y presión arterial media, marcadores bioquímicos como PAPP-A y/o PLGF), mediante la obtención de ecuaciones de regresión logística múltiple, pueden identificar un mayor porcentaje de gestantes con alto riesgo de desarrollar PE precoz con un alto grado de especificidad (155–161).

En el caso específico de mujeres con LES y/o SAF, la Guía NICE 2010 (4), la de la WHO 2011 (162), la SOMANZ Guideline 2014 (163), el US Preventive Task Force (USPSTF) 2014 (164) y la Sociedad de Obstetras y Ginecólogos Canadiense 2014 (165), consideran globalmente a las pacientes con alguno de estos diagnósticos como de alto riesgo de PE y recomiendan la administración de AAS en todas ellas, si bien la edad gestacional de inicio y la dosis varía entre las diferentes recomendaciones.

Sin embargo, de acuerdo con estudios más recientes, no todas las pacientes LES deben ser considerados de alto riesgo de PE. En el estudio PROMISSE (166), la presencia de

AL, el empleo previo de antihipertensivos y la actividad del lupus fueron predictivos de resultado gestacional adverso concepto que englobaba, entre otros, la PE, HTA o insuficiencia placentaria que conducían a parto pretérmino. Por el contrario, en el subgrupo de mujeres de raza blanca, no hipertensas, sin actividad lúpica, anticoagulante lúpico negativo y con plaquetas normales, la frecuencia de complicaciones fue menor del 8%. La presencia de trombopenia al inicio del embarazo como factor de riesgo de PE en mujeres con LES también ha sido identificada en otros estudios (167).

Por otro lado, un estudio poblacional noruego publicado en 2017 ha encontrado un riesgo aumentado de PE comparado con la población general entre las mujeres con lupus activo durante el embarazo (OR 5,33, IC95% 2,63-10,79), no así entre las que se mantuvieron en remisión (OR 1,58, IC95% 0,58-4,31). El riesgo de PE también fue significativamente mayor al comparar las dos subpoblaciones de mujeres con LES, activas y no activas (OR 3,38, IC95% 0,99-11,51) (168).

La existencia de NL se ha asociado de forma consistente con un riesgo alto de PE. En el estudio de Carmona et al. (169), la presencia de NL clase III y IV se asoció a una incidencia de PE / HTA del 37%, comparado con un 11% en pacientes con nefritis lúpica clase II y V y un 11% en pacientes con LES sin nefritis. En el estudio caso control de Bramham et al (170) y en el metaanálisis de Smyth et al. (48), la nefritis previa fue factor de riesgo de PE grave. Documentos de consenso recientes del EULAR/ERA-EDTA (54) y de la SEMI/SEN (50), consideran indicada la profilaxis de PE con AAS en presencia de NL activa o pasada.

La relación de los AAF con PE se ha mostrado en varios trabajos. Una revisión sistemática publicada en 2005 estableció un incremento del riesgo de PE de 9 veces en mujeres portadoras de AAF (171). Estudios posteriores en población general y en mujeres con LES confirman el carácter de factor de riesgo de PE de los AAF, particularmente AL o la combinación de varios anticuerpos (166,172,173). Si bien no hay estudios específicos de calidad sobre el efecto protector de la AAS en esta población, por extensión de las recomendaciones en población general de alto riesgo, los documentos de consenso recientes recomiendan la profilaxis primaria en mujeres con AAF, indicada además para la prevención de otras complicaciones como abortos o

muertes fetales (2,7,72). Por tanto, en esta población el tratamiento con AAS se administrará sin necesidad de screening.

## **6.2. ¿Debemos tratar con AAS a pacientes con PE previa o factores de riesgo de PE?**

- **Se recomienda la administración de AAS a dosis bajas para prevención de riesgo de PE en gestantes consideradas de alto riesgo (ver sección previa) (NE1++, GRA).**
- **Se recomienda iniciar la profilaxis con AAS antes de las 16 semanas de gestación (NE1+, GRA).**
- **Se recomienda utilizar dosis de AAS entre 100-150 mg/día (NE1+, GRA).**
- **Se recomienda administrar AAS en gestantes de alto riesgo a partir de las 16 semanas si no ha podido iniciarse previamente (NE1+, GRA).**
- **Se sugiere comenzar el tratamiento con AAS antes de la semana 12 en las pacientes con positividad mantenida para AAF (con o sin lupus) y/o presencia o historia previa de NL, sin esperar a los resultados del screening (NE4, GRA).**

Metaanálisis de estudios aleatorizados (174–181) muestran que la administración de AAS a baja dosis se asocia a una disminución significativa, aunque modesta, en el riesgo de desarrollar PE, PE grave y algunas de sus complicaciones, como la prematuridad, el retraso de crecimiento intrauterino (RCIU) o la muerte perinatal: PE: RR 0,83, IC 95% 0,77-0,89, NNT 72, IC 95% 52-119; parto prematuro RR 0,92, IC 95% 0,88-0,97, NNT 72, IC 95% 52-119; RCIU: RR 0,90, IC 95% 0,83-0,98, NNT 114, IC 95% 64-625; muerte perinatal: RR 0,86, IC 95% 0,76-0,98, NNT 243, IC 95% 131-1666 (176).

Aunque el momento de inicio de la profilaxis no ha sido específicamente objeto de evaluación, resultados de metaanálisis recientes muestran que la eficacia de la profilaxis es mayor si se inicia antes de las 16 semanas de embarazo (174,175,178,179). La disminución del riesgo fue significativamente mayor en todos los parámetros estudiados: PE, PE grave y sus complicaciones.

A pesar de que el máximo beneficio parece concentrarse en la administración de AAS antes de las 16 semanas, el metaanálisis de Roberge (179) muestra también un beneficio (aunque menor) en la incidencia de PE si la profilaxis se inicia más allá de las 20 semanas. Otro metaanálisis muy reciente (181) evidencia una reducción modesta

del riesgo de PE (10%) independiente del momento de inicio de la profilaxis (antes o después de las 16 semanas). Aunque el beneficio es menor si el tratamiento es después de las 16 semanas, su administración está indicada si consideramos los escasos efectos secundarios de la administración de AAS a dosis bajas en la gestación (182), la no evidencia de un mayor sangrado materno o fetal (183), de anomalías congénitas (184) o de incidencia de cierre prematuro ductus (185).

La dosis de AAS también juega un papel importante. En el metaanálisis de Roberge 2017 (179), 100 mg/d fueron significativamente más eficaces que dosis inferiores para la prevención de PE y particularmente de PE grave. Otros dos metaanálisis sugieren influencia de la dosis: en el de la Cochrane (176), la reducción de riesgo fue mayor con dosis de AAS > 75 mg/día o con la combinación de AAS > 75 mg/día + dipiridamol que con dosis inferiores a 75 mg/día. Otro metaanálisis (180) muestra una mayor reducción del riesgo con dosis entre 100 y 150 mg/día que con 50-80 mg/día.

Continúa sin ser conocido el mecanismo por el cual la AAS ejerce su acción protectora. La disminución del riesgo si se administra antes de las 16 semanas sugiere un papel sobre la placentación (muy avanzada, casi completada, hacia las 16 semanas); no obstante, la AAS aumenta la producción de prostaciclina y puede disminuir la disfunción endotelial actuaciones que pueden explicar su eficacia para prevenir la PE clínica si se administra más allá de las 20 semanas de embarazo.

Tal y como se discute en la sección anterior, la positividad mantenida de AAF (con o sin lupus) y la presencia o historia previa de NL se consideran como factores suficientes para inicio de profilaxis de PE sin necesidad de esperar al screening de primer trimestre. Si bien no hay evidencia concluyente de una mayor eficacia de administrar AAS antes de la semana 12, se estima que su inicio antes de ese momento puede mejorar el proceso de placentación sin incrementar los riesgos. Es más, en mujeres con AAF se recomienda la administración preconcepcional de AAS (ver sección Síndrome antifosfolípido).

### **6.3. ¿Qué utilidad tiene el estudio Doppler de arterias uterinas (AUT) en estas pacientes?**

- **Se sugiere realizar Doppler de AUt en el 1<sup>er</sup> y 2<sup>o</sup> trimestre, como parte del control obstétrico de estas pacientes. El Doppler en el 1<sup>er</sup> trimestre puede ser de especial interés en gestantes con LES consideradas de bajo riesgo de PE, en las que su alteración podría justificar el inicio de profilaxis con AAS (NE 3, GR D)**
- **En gestaciones con Doppler de AUt patológico en segundo trimestre, se sugiere despistaje de CIR con biometrías seriadas y Doppler de arteria umbilical (AU) desde la semana 26-28 (NE 2+, GR C).**

El Doppler de AUt mide la resistencia al paso de la sangre al espacio intervelloso, proporcionando una estimación indirecta de la calidad de la placentación; una placentación defectuosa está en la base de determinadas complicaciones vasculares gestacionales (CVG) que incluyen PE, CIR, óbito fetal y DPPNI.

El Doppler de AUt se emplea en la práctica clínica como predictor de dichas complicaciones ayudando a identificar en el primer y segundo trimestre a la gestante de alto riesgo y posibilitando de este modo la instauración de estrategias de prevención (profilaxis con AAS) y/o de diagnóstico precoz (protocolos de vigilancia antenatal - maternos y fetales- más rigurosos).

Existe evidencia suficiente que el Doppler de AUt tanto en el primer como en segundo trimestre es capaz de predecir, en gestaciones de alto riesgo, la aparición de estas CVG, particularmente la PE y el CIR graves precoces (186,187). Con menor nivel de evidencia una revisión sistemática y metaanálisis (188), indica que el Doppler de AUt en segundo trimestre es útil para predecir la muerte fetal intraútero. Por ello se recomienda su práctica en el manejo de gestaciones de riesgo elevado.

La capacidad predictiva es mayor cuando la exploración tiene lugar en el segundo trimestre de la gestación comparada con el primer trimestre (187). El Doppler de AUt es mejor predictor de PE que de CIR (187) y, además, de las formas graves y precoces (186,187). En metaanálisis que se han ocupado específicamente de este aspecto (187), el aumento del IP con notch resulta el mejor predictor de PE y de CIR.

El papel del Doppler de AUt ha sido evaluado en publicaciones de series de pacientes con SAF y/o LES tanto retrospectivas (189–192) como prospectivas (60,193,194). La mayoría investigan el Doppler de AUt en el segundo trimestre, siendo variado el tipo

de población investigado, por ejemplo, en el caso del SAF, gestantes con solo historia de aborto recurrente o pacientes con historia de muerte fetal previa, trombosis o de complicaciones gestacionales graves (CIR, PE grave precoz).

En las series de Caruso (191), Venkat-Raman (193), Bats (194) y Le Thi Huong (60), la sensibilidad y el VPP varían, y en general no son muy satisfactorios, con valores de sensibilidad (25-70%) y VPP (29-80%) para PE, CIR o muerte fetal. La especificidad para las mismas complicaciones es de entre un 92-100% y el VPN entre un 94 a 100%. No parece haber grandes diferencias dependiendo del tipo de complicación (PE, CIR, óbito fetal).

El estudio de Venkat-Raman (193) evaluó prospectivamente el papel del Doppler de AUt en la semana 24 en la predicción de la PE y RCIU. Se estudiaron 170 gestantes con síndrome antifosfolípido e historia de aborto recurrente. La incidencia de PE y de CIR < al 10º percentil fueron ambas del 10%.

La presencia de notch de AUt (no el IP) predijo la aparición PE y/o CIR, particularmente en el grupo de pacientes con notch bilateral y positividad para AL; en este subgrupo, la sensibilidad fue del 75% (PE) y 80% (CIR), con VPP de 75% y 80% respectivamente. La especificidad fue de 94% y 94% y el VPP también 94% y 94%. No obstante, si se considera no sólo el subgrupo de pacientes con AL positivo sino el grupo total la sensibilidad para la PE y CIR fueron bajas, de alrededor del 24% con VPP del 40%. La especificidad resulto del 84% y el VPN del 89%.

Otro estudio prospectivo (60) en pacientes con LES y/o SAF (116 gestantes de las que 44 eran pacientes con LES, 24 con SAF secundario y 32 con SAF primario) muestra en análisis multivariante que el notch de arteria uterina predijo complicaciones graves como la PE, el CIR o el parto prematuro antes de la semana 34 por insuficiencia placentaria grave o PE. La OR fue de 13,84 IC 95% 3,41-56,16  $p=0,001$ , si bien no mostró vínculo con la muerte fetal o neonatal.

Otro estudio prospectivo, (194) evaluó el papel de Doppler de AUt las 12-15 semanas en gestantes con SAF seleccionadas por el antecedente de muerte fetal previa. En este colectivo de muy alto riesgo, se produjeron 6 casos de CIR y otro de PE asociada a CIR.

No hubo muertes fetales. El resultado de mayor interés del estudio fue el elevado VPN para dichas complicaciones, superior al 92%.

De modo similar, en las pacientes con LES (con o sin SAF secundario), el Doppler de AUt anormal en el segundo trimestre (definido aquí por alteraciones en el IP) sugiere eficacia en la predicción de complicaciones obstétricas. La evidencia al respecto se apoya en estudios prospectivos (60,195) y retrospectivos (196,197) de series de casos y en algún estudio retrospectivo de cohortes (61). Todos ellos sugieren que el Doppler de AUt en segundo trimestre es un buen indicador de complicaciones obstétricas principalmente PE y CIR.

Los dos estudios más representativos son el de Pagani (61), un estudio de cohortes en 70 gestaciones en 64 mujeres con LES. La incidencia de PE fue del 6% y la de CIR del 7%, la incidencia de resultado gestacional adverso (término que incluía la presencia de al menos, una de las siguientes complicaciones: PE, CIR, óbito fetal o neonatal o DPPNI) del 10%. El Doppler de AUt anormal entre la 23 y 26 semanas mostró una sensibilidad de 1,0 ( IC95 % 0,5-1,0) y especificidad de 1,0, (IC95 % 0,95-1,0) para PE; 0,40 ( IC95 % 0,12-0,77) y 0,97 (IC 95% 0,89-0,99) para CIR y 0.57 ( IC95 % 0,25-0,84) y 1,0 ( IC95 % 0,94-1,0) para resultado gestacional adverso.

En el estudio de Le Thi Huong (60), de todos los factores pronósticos evaluados (historia médica u obstétrica, examen médico y obstétrico, datos biológicos y Doppler (AUt y AU) solo el notch bilateral en el Doppler de AUt fue capaz de predecir en análisis multivariante la aparición de un resultado obstétrico desfavorable.

En la serie de López-Farfán (195) el Doppler de AUt alterado ( $IP \geq 1.45$ ) entre la semana 18-23 predijo el CIR con una sensibilidad del 100%, especificidad del 91% VPP del 83% y VPN del 100%.

Tomados en conjunto todos estos estudios, sugieren que el Doppler de AUt, particularmente en segundo trimestre de la gestación es útil en la predicción de las complicaciones obstétricas citadas como PE, CIR y en menor grado el óbito fetal. Los resultados en términos de sensibilidad, especificidad VPN y VPP son similares a los obtenidos en población general de alto riesgo y tanto mejores cuanto mayor sea el riesgo basal de la población estudiada.

#### 6.4. ¿Qué utilidad tiene el estudio Doppler de circulación fetal en estas pacientes?

- Se recomienda la utilización del Doppler de AU como método primario de monitorización del feto pequeño para la edad gestacional (SGA) y el CIR (NE1+, GRA).
- Se sugiere la utilización rutinaria del Doppler de AU en mujeres con AAF y LES con factores de riesgo, obstétrico o médicos, para sufrir complicaciones vasculares gestacionales, especialmente CIR (NE3, GRD).

El Doppler fetoplacentario es un método no invasivo que se ha evidenciado como un instrumento útil para el manejo de las gestaciones de alto riesgo. La fluxometría Doppler fetoplacentaria integra la exploración en diversos vasos arteriales (arteria uterina, arteria umbilical, arteria cerebral media) y venosos, (ductus venoso y vena umbilical).

El Doppler de AU es, sin duda, el territorio más investigado y el único cuya incorporación se asocia a una disminución de la morbilidad perinatal. Su práctica en SGA permite distinguir el feto constitucionalmente pequeño del feto con CIR, establecer la periodicidad de exploraciones, determinar el momento del parto y contribuir a decidir la vía del mismo, particularmente en las formas de CIR o PE grave precoces con insuficiencia placentaria (198).

La alteración inicial a nivel del Doppler de AU consiste en un aumento del índice S/D como consecuencia del incremento de resistencia en los vasos placentarios. La adaptación a la hipoxia origina cambios detectables en la ACM (arteria cerebral media) con fenómeno de *brain sparing* manifestado por un descenso del índice S/D en dicha arteria. Conforme el proceso continúa, originando un aumento progresivo en las resistencias placentarias, se observa a nivel de la AU la desaparición del flujo diastólico y, en fases posteriores, su inversión. Estas dos alteraciones (particularmente la última) se asocian a tasas de mortalidad perinatal elevadas, con tasas corregidas (exclusión de anomalías cromosómicas o malformaciones) de 340/1000 nacidos vivos (199).

Conforme la situación persiste el Doppler de la ACM se normaliza o incluso se eleva como consecuencia de la pérdida de los cambios adaptativos. Paralelo al deterioro de la función cardíaca -debido a la hipoxia crónica- se desarrolla un flujo ausente o

inverso en el ductus venoso y un pulso venoso pulsátil en la vena umbilical. Estos últimos cambios suelen ser preterminales. Cuando el flujo venoso (ductus y vena umbilical) son anormales, el riesgo de muerte fetal aumenta significativamente si se compara cuando solo los flujos arteriales son anormales (200).

Las alteraciones descritas están presentes también en muchos casos de PE grave precoz. En las formas de CIR severo precoz, la PE coexiste en un 50% de los casos.

En población de alto riesgo, el Doppler de AU ha demostrado ser capaz de reducir la morbilidad y mortalidad perinatal. Existe una evidencia suficiente de que el Doppler de arteria umbilical es un instrumento útil en el control del embarazo de riesgo. Una revisión sistemática de estudios observacionales (201) que incluyó 19.191 fetos mostro que el Doppler de AU fue capaz de predecir el compromiso fetal y/o neonatal con un LR+ de 3,41 (IC 95% 2,68-4,34) y un LR- de 0,55 (IC 95% 0,48-0,62). El Doppler de AU predijo también tanto la muerte fetal (LR+ 4,37, IC 95% 0,88-21,8; LR- 0,25, IC 95% 0,07-0,91) como la acidosis (LR+ 2,75, IC 95% 1,48-5,11; LR- 0,58; IC 95% 0,36-0,94).

El Doppler de AU es el principal estándar clínico para distinguir entre feto SGA y feto con CIR (202–204), es decir para distinguir el feto pequeño con riesgo hipóxico bajo del feto con riesgo hipóxico y aumento significativo de la morbimortalidad perinatal. Esta estrategia reduce la mortalidad perinatal al mismo tiempo que el número de intervenciones innecesarias (finalización activa de la gestación).

El Doppler de AU y sus hallazgos (aumento del índice S/D, ausencia de componente diastólico, flujo diastólico reverso), se ha mostrado en diversos metaanálisis y revisiones sistemáticas de estudios realizados en población de riesgo principalmente gestaciones complicadas con RCIU) como un elemento fundamental en el manejo de estas gestaciones.

El más reciente es el publicado por Alfirevic en 2017 (205), que evaluó 19 estudios con 10.667 gestantes de riesgo. Este metaanálisis pone en evidencia una disminución de la mortalidad perinatal del 29%. RR 0,71 (IC 95% 0,52-0,98). La incidencia de muerte perinatal fue de 1,2% en el grupo de gestaciones en las que se realizó Doppler vs un 1,7% en el grupo sin Doppler. El NNT para prevenir una muerte perinatal fue de 203. El metaanálisis pone de manifiesto también otros beneficios, como un descenso en el

número de inducciones de parto (RR 0,89; IC 95% 0,80-0,99), sin que ello comporte un incremento en el porcentaje de parto vaginal operatorio (RR 0,95; IC 95% 0,80-1,14), o en el de índices de Apgar < 7 a los 5 minutos (RR 0,92; IC 95% 0,69-1,12). Los autores recomiendan que las gestaciones con alto riesgo de insuficiencia placentaria deben ser controladas mediante Doppler de AU.

Como limitaciones a este metaanálisis cabe citar que, en la población estudiada, la presencia de fetos con CIR fue muy amplia, aunque no exclusiva. Por otro lado, y a pesar de la disminución de la morbilidad observada, fue notoria la variabilidad en los protocolos utilizados en los distintos estudios para el manejo de la gestación.

En el caso concreto de mujeres con LES y/o AAF, la evidencia directa es mucho menor. El estudio de *Farine et al* (207), en una serie retrospectiva de 56 gestantes con LES, detectó flujo telediastólico ausente o reverso en el 11% de los casos. Este subgrupo de pacientes tuvo mayor riesgo de PE, CIR y parto pretérmino. *Le Thi Huong et al* (60) en un estudio prospectivo, evaluó la capacidad predictiva de diversos parámetros respecto a la muerte fetal/neonatal o los resultados obstétricos adversos (muerte fetal o neonatal, parto pretérmino por PE o CIR insuficiencia placentaria grave antes de las 34 semanas, HELLP o eclampsia). El Doppler de AU anormal en segundo trimestre (flujo reverso o ausente) mostró, en análisis uni y multivariantes, correlación la muerte fetal y neonatal (OR 7,44; IC95% 1,02–54, p=0,047). Sólo la presencia de notch en el Doppler de AUt en segundo trimestre presento una correlación significativa con el conjunto de resultados obstétricos adversos. *Carmona et al* (81) en una serie de 65 pacientes con SAF en la que se produjeron 5 muertes fetales intrauterinas (9%) observa, en análisis multivariante, que el Doppler de AU realizado entre la 23- 26 semanas fue capaz de predecir la muerte fetal.

### **Fuentes de financiación**

La presente investigación no ha recibido ayudas específicas provenientes de agencias del sector público, sector comercial o entidades sin ánimo de lucro.

### **Declaración de conflicto de intereses**

**E. Rodríguez Almaraz:** ha recibido financiación en concepto de Ponencias, cursos y congresos: Novartis, Roche, GSK, Menarini, Grünenthal, Abbvie, UCB y Lilly, y becas de investigación: MSD

**L. Sáez-Comet:** ninguno

**M. Casellas:** ninguno

**P. Delgado:** ninguno

**A. Ugarte:** ninguno

**P. Vela-Casasempere:** ninguno

**N. Martínez Sánchez:** ninguno

**M. Galindo-Izquierdo:** ninguno

**G. Espinosa:** ninguno

**B. Marcos:** ninguno

**J.A. Martínez López:** ninguno

**A. Robles-Marhuenda:** ninguno

**V. Martínez-Taboada<sup>12</sup>:** ha recibido financiación de Roche para la financiación de un proyecto de investigación independiente, y de Sanofi en concepto de ponencias.

**J.L. Bartha:** ninguno

**G. Ruiz-Irastorza:** ninguno



## **BIBLIOGRAFÍA**

1. Martínez López JA, García Vivar ML, Cáliz R, Freire M, Galindo M, Hernández MV, et al. Recomendaciones sobre actuaciones a seguir durante la edad fértil, el embarazo, posparto y lactancia en pacientes con enfermedades reumáticas inflamatorias y autoinmunes. *Reumatol Clin* 2017;13:264-81.
2. Grupo de trabajo de la Guía de Práctica Clínica sobre Lupus Eritematoso Sistémico. Guía de Práctica Clínica sobre Lupus Eritematoso Sistémico. Ministerio de Sanidad, Servicios Sociales e Igualdad. Servicio de Evaluación del Servicio Canario de la Salud; 2015. Guías de Práctica Clínica en el SNS.
3. Petri M. The Hopkins Lupus Pregnancy Center: Ten Key Issues in Management. *Rheum Dis Clin N Am* 2007;33:227-35.
4. Visintin C, Muggleston MA, Almerie MQ, Nherera LM, James D, Walkinshaw S, et al. Management of hypertensive disorders during pregnancy: summary of NICE guidance. *Br Med J* 2010;341:c2207.
5. American College of Obstetricians and Gynecologists, Task Force on Hypertension in Pregnancy. Hypertension in pregnancy. Report of the American College of Obstetricians and Gynecologists' Task Force on Hypertension in Pregnancy. *Obstet Gynecol* 2013;122:1122-31.
6. Lazzaroni MG, Dall'Ara F, Fredi M, Nalli C, Reggia R, Lojcono A, et al. A comprehensive review of the clinical approach to pregnancy and systemic lupus erythematosus. *J Autoimmun* 2016;74:106-17.
7. Andreoli L, Bertsias GK, Agmon-Levin N, Brown S, Cervera R, Costedoat-Chalumeau N, et al. EULAR recommendations for women's health and the management of family planning, assisted reproduction, pregnancy and menopause in patients with systemic lupus erythematosus and/or antiphospholipid syndrome. *Ann Rheum Dis* 2017;76:476-85.
8. Kattah AG, Garovic VD. Pregnancy and Lupus Nephritis. *Semin Nephrol* 2015;35:487-99.

9. Stanhope TJ, White WM, Moder KG, Smyth A, Garovic VD. Obstetric Nephrology: Lupus and Lupus Nephritis in Pregnancy. *Clin J Am Soc Nephrol* 2012;7:2089-99.
10. Trastornos hipertensivos del embarazo. Protocolos SEGO. *Prog Obstet Ginecol*. 2007;50:446-55
11. Clowse MEB, Jamison M, Myers E, James AH. A national study of the complications of lupus in pregnancy. *Am J Obstet Gynecol* 2008;199:127.e1-127.e6.
12. Østensen M, Khamashta M, Lockshin M, Parke A, Brucato A, Carp H, et al. Anti-inflammatory and immunosuppressive drugs and reproduction. *Arthritis Res Ther* 2006;8:209.
13. Ruiz-Arruza I, Barbosa C, Ugarte A, Ruiz-Irastorza G. Comparison of high versus low-medium prednisone doses for the treatment of systemic lupus erythematosus patients with high activity at diagnosis. *Autoimmun Rev* 2015;14:875-9.
14. Zeher M, Doria A, Lan J, Aroca G, Jayne D, Boletis I, et al. Efficacy and safety of enteric-coated mycophenolate sodium in combination with two glucocorticoid regimens for the treatment of active lupus nephritis. *Lupus* 2011;20:1484-93.
15. Ruiz-Irastorza G, Danza A, Perales I, Villar I, Garcia M, Delgado S, et al. Prednisone in lupus nephritis: how much is enough? *Autoimmun Rev*. 2014;13:206–214.
16. Badsha H, Edwards CJ. Intravenous pulses of methylprednisolone for systemic lupus erythematosus. *Semin Arthritis Rheum* 2003;32:370-7.
17. Isenberg DA, Morrow WJ, Snaith ML. Methyl prednisolone pulse therapy in the treatment of systemic lupus erythematosus. *Ann Rheum Dis* 1982;41:347-51.
18. Kimberly RP, Lockshin MD, Sherman RL, McDougal JS, Inman RD, Christian CL. High-dose intravenous methylprednisolone pulse therapy in systemic lupus erythematosus. *Am J Med* 1981;70:817-24.

19. Iglehart IW, Sutton JD, Bender JC, Shaw RA, Ziminski CM, Holt PA, et al. Intravenous pulsed steroids in rheumatoid arthritis: a comparative dose study. *J Rheumatol*. 1990;17:159-62.
20. Badsha H, Kong KO, Lian TY, Chan SP, Edwards CJ, Chng HH. Low-dose pulse methylprednisolone for systemic lupus erythematosus flares is efficacious and has a decreased risk of infectious complications. *Lupus*. 2002;11:508-13.
21. Wilson KS, Gray CE, Lidgard GP, Parker AC. Recovery of hypothalamic-pituitary-adrenal function after intermittent high-dose prednisolone and cytotoxic chemotherapy. *Postgrad Med J* 1977;53:745-8.
22. Griffiths B, Emery P, Ryan V, Isenberg D, Akil M, Thompson R, et al. The BILAG multi-centre open randomized controlled trial comparing ciclosporin vs azathioprine in patients with severe SLE. *Rheumatology (Oxford)* 2010;49:723-32.
23. Dammacco F, Della Casa Alberighi O, Ferraccioli G, Racanelli V, Casatta L, Bartoli E. Cyclosporine-A plus steroids versus steroids alone in the 12-month treatment of systemic lupus erythematosus. *Int J Clin Lab Res*. 2000;30:67-73.
24. Pego-Reigosa JM, Cobo-Ibáñez T, Calvo-Alén J, Loza-Santamaría E, Rahman A, Muñoz-Fernández S, et al. Efficacy and safety of nonbiologic immunosuppressants in the treatment of nonrenal systemic lupus erythematosus: a systematic review. *Arthritis Care Res* 2013;65:1775-85.
25. Götestam Skorpen C, Hoeltzenbein M, Tincani A, Fischer-Betz R, Elefant E, Chambers C, et al. The EULAR points to consider for use of antirheumatic drugs before pregnancy, and during pregnancy and lactation. *Ann Rheum Dis* 2016;75:795-810.
26. Webster P, Wardle A, Bramham K, Webster L, Nelson-Piercy C, Lightstone L. Tacrolimus is an effective treatment for lupus nephritis in pregnancy. *Lupus* 2014;23:1192-6.
27. Monova D, Belovezhkov N, Altunkova I, Monov S. Intravenous immunoglobulin G in the treatment of patients with chronic glomerulonephritis: clinical experience lasting 15 years. *Nephron* 2002;90:262-6.

28. Arnal C, Piette J, Léone J, Taillan B, Hachulla E, Roudot-Thoraval F, et al. Treatment of severe immune thrombocytopenia associated with systemic lupus erythematosus: 59 cases. *J Rheumatol* 2002;29:75-83.
29. Amant F, Loibl S, Neven P, Van Calsteren K. Breast cancer in pregnancy. *Lancet* 2012;379:570-9.
30. Chakravarty EF, Murray ER, Kelman A, Farmer P. Pregnancy outcomes after maternal exposure to rituximab. *Blood* 2011;117:1499-506.
31. Clowse MEB, Magder L, Witter F, Petri MA. Hydroxychloroquine in lupus pregnancy. *Arthritis Rheum* 2006;54:3640–3647.
32. Li D-K, Liu L, Odouli R. Exposure to non-steroidal anti-inflammatory drugs during pregnancy and risk of miscarriage: population based cohort study. *BMJ* 2003;327:368.
33. Uhler ML, Hsu JW, Fisher SG, Zinaman MJ. The effect of nonsteroidal anti-inflammatory drugs on ovulation: a prospective, randomized clinical trial. *Fertil Steril* 2001;76:957-61.
34. Ruiz-Arruza I, Ugarte A, Cabezas-Rodriguez I, Medina J-A, Moran M-A, Ruiz-Irastorza G. Glucocorticoids and irreversible damage in patients with systemic lupus erythematosus. *Rheumatology (Oxford)* 2014;53:1470-6.
35. Ruiz-Irastorza G, Olivares N, Ruiz-Arruza I, Martinez-Berriotxo A, Egurbide M-V, Aguirre C. Predictors of major infections in systemic lupus erythematosus. *Arthritis Res Ther* 2009;11:R109.
36. Stahn C, Buttgerit F. Genomic and nongenomic effects of glucocorticoids. *Nat Clin Pract Rheumatol* 2008;4:525-33.
37. Buyon JP, Cronstein BN, Morris M, Tanner M, Weissmann G. Serum complement values (C3 and C4) to differentiate between systemic lupus activity and pre-eclampsia. *Am J Med* 1986;81:194-200.
38. Nelson-Piercy C. Handbook of obstetric medicine. CRC Press; 2015.

39. Petri M, Genovese M, Engle E, Hochberg M. Definition, incidence, and clinical description of flare in systemic lupus erythematosus. A prospective cohort study. *Arthritis Rheum* 1991;34:937-44.
40. Ruiz-Irastorza G, Khamashta MA, Gordon C, Lockshin MD, Johns KR, Sammaritano L, et al. Measuring systemic lupus erythematosus activity during pregnancy: validation of the lupus activity index in pregnancy scale. *Arthritis Rheum* 2004;51:78-82.
41. Saavedra Salinas MÁ, Barrera Cruz A, Cabral Castañeda AR, Jara Quezada LJ, Arce-Salinas CA, Álvarez Nemegyei J, et al. Guías de práctica clínica para la atención del embarazo en mujeres con enfermedades reumáticas autoinmunes del Colegio Mexicano de Reumatología. Parte I. *Reumatol Clin* 2015;11:295-304.
42. Smyth A, Radovic M, Garovic VD. Women, Kidney Disease, and Pregnancy. *Adv Chronic Kidney Dis* 2013;20:402-10.
43. Karim MY, D'Cruz DP. Practical management of lupus nephritis in pregnancy and the puerperium. *Expert Rev Clin Pharmacol* 2010;3:777-84.
44. Imbasciati E, Tincani A, Gregorini G, Doria A, Moroni G, Cabiddu G, et al. Pregnancy in women with pre-existing lupus nephritis: predictors of fetal and maternal outcome. *Nephrol Dial Transplant* 2008;24:519-25.
45. Bramham K, Soh M, Nelson-Piercy C. Pregnancy and renal outcomes in lupus nephritis: an update and guide to management. *Lupus* 2012;21:1271-83.
46. Moroni G, Doria A, Giglio E, Tani C, Zen M, Strigini F, et al. Fetal outcome and recommendations of pregnancies in lupus nephritis in the 21st century. A prospective multicenter study. *J Autoimmun* 2016;74:6-12.
47. Moroni G, Doria A, Giglio E, Imbasciati E, Tani C, Zen M, et al. Maternal outcome in pregnant women with lupus nephritis. A prospective multicenter study. *J Autoimmun*. 2016;74:194-200.

48. Smyth A, Oliveira GHM, Lahr BD, Bailey KR, Norby SM, Garovic VD. A Systematic Review and Meta-Analysis of Pregnancy Outcomes in Patients with Systemic Lupus Erythematosus and Lupus Nephritis. *Clin J Am Soc Nephrol* 2010;5:2060-8.
49. Lv J, Wang W, Li Y. Clinical outcomes and predictors of fetal and maternal consequences of pregnancy in lupus nephritis patients. *Int Urol Nephrol* 2015;47:1379-85.
50. Ruiz-Irastorza G, Espinosa G, Frutos MA, Alonso JJ, Praga M, Pallarés L, et al. Diagnóstico y tratamiento de la nefritis lúpica: Documento de consenso del Grupo de Enfermedades Autoinmunes Sistémicas de la Sociedad Española de Medicina Interna y de la Sociedad Española de Nefrología. *Rev Clin Esp.* 2012;212:147–e1.
51. Day C, Hewins P, Hildebrand S, Sheikh L, Taylor G, Kilby M, et al. The role of renal biopsy in women with kidney disease identified in pregnancy. *Nephrol Dial Transplant* 2007;23:201-6.
52. Piccoli G, Daidola G, Attini R, Parisi S, Fassio F, Naretto C, et al. Kidney biopsy in pregnancy: evidence for counselling? A systematic narrative review. *Br J Obstet Gynaecol* 2013;120:412-27.
53. Chen TK, Gelber AC, Witter FR, Petri M, Fine DM. Renal biopsy in the management of lupus nephritis during pregnancy. *Lupus* 2015;24:147-54.
54. Bertsias GK, Tektonidou M, Amoura Z, Aringer M, Bajema I, Berden JHM, et al. Joint European League Against Rheumatism and European Renal Association–European Dialysis and Transplant Association (EULAR/ERA-EDTA) recommendations for the management of adult and paediatric lupus nephritis. *Ann Rheum Dis* 2012;71:1771-82.
55. Powe CE, Levine RJ, Karumanchi SA. Preeclampsia, a Disease of the Maternal Endothelium: The Role of Antiangiogenic Factors and Implications for Later Cardiovascular Disease. *Circulation* 2011;123:2856-69.
56. Lynch A, Murphy J, Gibbs R, Levine R, Giclas P, Salmon J, et al. The interrelationship of complement-activation fragments and angiogenesis-related factors in early pregnancy

and their association with pre-eclampsia: Complement, angiogenesis, pre-eclampsia and obesity. *Br J Obstet Gynaecol* 2010;117:456-62.

57. de Jesus G, de Jesus N, Levy R, Klumb E. The use of angiogenic and antiangiogenic factors in the differential diagnosis of pre-eclampsia, antiphospholipid syndrome nephropathy and lupus nephritis. *Lupus* 2014;23:1299-301.
58. Qazi U, Lam C, Karumanchi SA, Petri M. Soluble Fms-like tyrosine kinase associated with preeclampsia in pregnancy in systemic lupus erythematosus. *J Rheumatol* 2008;35:631-4.
59. Herraiz García I, Jiménez L, Elena A, Arriaga G, Isabel P, Escribano Abad D, et al. Doppler de arterias uterinas y marcadores angiogénicos (sFlt-1/PIGF): futuras implicaciones para la predicción y el diagnóstico de la preeclampsia. *Diagn Prenat* 2011;22:32-40.
60. Le Thi Huong D, Wechsler B, Vauthier-Brouzes D, Duhaut P, Costedoat N, Andreu MR, et al. The second trimester Doppler ultrasound examination is the best predictor of late pregnancy outcome in systemic lupus erythematosus and/or the antiphospholipid syndrome. *Rheumatology (Oxford)* 2006;45:332-8.
61. Pagani G, Reggia R, Andreoli L, Prefumo F, Zatti S, Lojcono A, et al. The role of second trimester uterine artery Doppler in pregnancies with systemic lupus erythematosus: Uterine artery pulsatility in pregnant SLE patients. *Prenat Diagn* 2015;35:447-52.
62. Redman CWG, Sargent IL. Immunology of Pre-Eclampsia. *Am J Reprod Immunol* 2010;63:534-43.
63. Lateef A, Petri M. Managing lupus patients during pregnancy. *Best Pract Res Clin Rheumatol* 2013;27:435-47.
64. Angiogenic factor imbalance early in pregnancy predicts adverse outcomes in patients with lupus and antiphospholipid antibodies: results of the PROMISSE study. *Am J Obstet Gynecol* 2016;214:108.e1-108.e14.

65. Fischer-Betz R, Chehab G, Sander O, Vordenbäumen S, Voiculescu A, Brinks R, et al. Renal outcome in patients with lupus nephritis using a steroid-free regimen of monthly intravenous cyclophosphamide: a prospective observational study. *J Rheumatol*. 2012;39:2111–2117.
66. Ruiz-Irastorza G, Ugarte A, Saint-Pastou Terrier C, Lazaro E, Iza A, Couzi L, et al. Repeated pulses of methyl-prednisolone with reduced doses of prednisone improve the outcome of class III, IV and V lupus nephritis: An observational comparative study of the Lupus-Cruces and lupus-Bordeaux cohorts. *Autoimmun Rev* 2017;16:826-32.
67. Ruiz-Irastorza G, Ramos-Casals M, Brito-Zeron P, Khamashta MA. Clinical efficacy and side effects of antimalarials in systemic lupus erythematosus: a systematic review. *Ann Rheum Dis* 2010;69:20–28.
68. Sangle SR, Lutalo PMK, Davies RJ, Khamashta MA, D’Cruz DP. B-cell depletion therapy and pregnancy outcome in severe, refractory systemic autoimmune diseases. *J Autoimmun* 2013;43:55-9.
69. Derksen RH, Hené RJ, Kallenberg CG, Valentijn RM, Kater L. Prospective multicentre trial on the short-term effects of plasma exchange versus cytotoxic drugs in steroid-resistant lupus nephritis. *Neth J Med* 1988;33:168-77.
70. Kronbichler A, Brezina B, Quintana LF, Jayne DRW. Efficacy of plasma exchange and immunoadsorption in systemic lupus erythematosus and antiphospholipid syndrome: A systematic review. *Autoimmun Rev* 2016;15:38-49.
71. Flint J, Panchal S, Hurrell A, van de Venne M, Gayed M, Schreiber K, et al. BSR and BHPR guideline on prescribing drugs in pregnancy and breastfeeding—Part II: analgesics and other drugs used in rheumatology practice. *Rheumatology (Oxford)* 2016;55:1698–1702.
72. de Jesus GR, Agmon-Levin N, Andrade CA, Andreoli L, Chighizola CB, Porter TF, et al. 14th International Congress on Antiphospholipid Antibodies Task Force report on obstetric antiphospholipid syndrome. *Autoimmun Rev* 2014;13:795-813.

73. Ziakas PD, Pavlou M, Voulgarelis M. Heparin treatment in antiphospholipid syndrome with recurrent pregnancy loss: a systematic review and meta-analysis. *Obstet Gynecol* 2010;115:1256-62.
74. Mak A, Cheung MW-L, Cheak AA, Ho RC-M. Combination of heparin and aspirin is superior to aspirin alone in enhancing live births in patients with recurrent pregnancy loss and positive anti-phospholipid antibodies: a meta-analysis of randomized controlled trials and meta-regression. *Rheumatology (Oxford)* 2010;49:281-8.
75. Pollard JK, Scott JR, Branch DW. Outcome of children born to women treated during pregnancy for the antiphospholipid syndrome. *Obstet Gynecol* 1992;80:365-8.
76. Bramham K, Hunt BJ, Germain S, Calatayud I, Khamashta M, Bewley S, et al. Pregnancy outcome in different clinical phenotypes of antiphospholipid syndrome. *Lupus* 2010;19:58-64.
77. van Hoorn ME, Hague WM, van Pampus MG, Bezemer D, de Vries JIP, FRUIT investigators. Low-molecular-weight heparin and aspirin in the prevention of recurrent early-onset pre-eclampsia in women with antiphospholipid antibodies: the FRUIT-RCT. *Eur J Obstet Gynecol Reprod Biol* 2016;197:168–173.
78. Bates SM, Greer IA, Middeldorp S, Veenstra DL, Prabulos A-M, Vandvik PO. VTE, thrombophilia, antithrombotic therapy, and pregnancy: Antithrombotic Therapy and Prevention of Thrombosis, 9th ed: American College of Chest Physicians Evidence-Based Clinical Practice Guidelines. *Chest* 2012;14:e691S-e736S.
79. Keeling D, Mackie I, Moore GW, Greer IA, Greaves M, British Committee for Standards in Haematology. Guidelines on the investigation and management of antiphospholipid syndrome. *Br J Haematol* 2012;157:47-58.
80. Roberge S, Nicolaides K, Demers S, Hyett J, Chaillet N, Bujold E. The role of aspirin dose on the prevention of preeclampsia and fetal growth restriction: systematic review and meta-analysis. *Am J Obstet Gynecol* 2017;216:110–120

81. Carmona F, Font J, Azulay M, Creus M, Fábregues F, Cervera R, et al. Risk factors associated with fetal losses in treated antiphospholipid syndrome pregnancies: a multivariate analysis. *Am J Reprod Immunol* 1989 2001;46:274-9.
82. Amengual O, Fujita D, Ota E, Carmona L, Oku K, Sugiura-Ogasawara M, et al. Primary prophylaxis to prevent obstetric complications in asymptomatic women with antiphospholipid antibodies: a systematic review. *Lupus* 2015;24:1135-42.
83. Ruiz-Irastorza G, Crowther M, Branch W, Khamashta MA. Antiphospholipid syndrome. *Lancet* 2010;376:1498-509.
84. Erkan D, Patel S, Nuzzo M, Gerosa M, Meroni PL, Tincani A, et al. Management of the controversial aspects of the antiphospholipid syndrome pregnancies: a guide for clinicians and researchers. *Rheumatology (Oxford)* 2008;47:S23-27.
85. Mekinian A, Lazzaroni MG, Kuzenko A, Alijotas-Reig J, Ruffatti A, Levy P, et al. The efficacy of hydroxychloroquine for obstetrical outcome in anti-phospholipid syndrome: Data from a European multicenter retrospective study. *Autoimmun Rev* 2015;14:498-502.
86. Bramham K, Thomas M, Nelson-Piercy C, Khamashta M, Hunt BJ. First-trimester low-dose prednisolone in refractory antiphospholipid antibody-related pregnancy loss. *Blood* 2011;117:6948-51.
87. Tenti S, Cheleschi S, Guidelli GM, Galeazzi M, Fioravanti A. Intravenous immunoglobulins and antiphospholipid syndrome: How, when and why? A review of the literature. *Autoimmun Rev* 2016;15:226-35.
88. Ruffatti A, Favaro M, Hoxha A, Zambon A, Marson P, Del Ross T, et al. Apheresis and intravenous immunoglobulins used in addition to conventional therapy to treat high-risk pregnant antiphospholipid antibody syndrome patients. A prospective study. *J Reprod Immunol* 2016;115:14-9.

89. Lefkou E, Mamopoulos A, Dagklis T, Vosnakis C, Roussou D, Girardi G. Pravastatin improves pregnancy outcomes in obstetric antiphospholipid syndrome refractory to antithrombotic therapy. *J Clin Invest* 2016;126:2933-40.
90. Myers B. Diagnosis and management of maternal thrombocytopenia in pregnancy. *Br J Haematol* 2012;158:3-15.
91. Østensen M, Lockshin M, Doria A, Valesini G, Meroni P, Gordon C, et al. Update on safety during pregnancy of biological agents and some immunosuppressive anti-rheumatic drugs. *Rheumatology (Oxford)* 2008;47:S28-31.
92. Gernsheimer T, James AH, Stasi R. How I treat thrombocytopenia in pregnancy. *Blood* 2013;121:38-47.
93. Greer IA, Nelson-Piercy C. Low-molecular-weight heparins for thromboprophylaxis and treatment of venous thromboembolism in pregnancy: a systematic review of safety and efficacy. *Blood* 2005;106:401-7.
94. Nelson-Piercy C, Powrie R, Borg J-Y, Rodger M, Talbot DJ, Stinson J, et al. Tinzaparin use in pregnancy: an international, retrospective study of the safety and efficacy profile. *Eur J Obstet Gynecol Reprod Biol* 2011;159:293-9.
95. Bennett A, Chunilal S. Diagnosis and Management of Deep Vein Thrombosis and Pulmonary Embolism in Pregnancy. *Semin Thromb Hemost* 2016;42:760-73.
96. Abdul Sultan A, West J, Tata LJ, Fleming KM, Nelson-Piercy C, Grainge MJ. Risk of first venous thromboembolism in pregnant women in hospital: population based cohort study from England. *Br Med J* 2013;347:f6099.
97. Thomsen A, Greer I. Thromboembolic disease in pregnancy and the puerperium: acute management (Green-top guideline no. 37b). *R Coll Obstet Gynaecol*; 2015.
98. Chan W-S, Rey E, Kent NE, VTE in Pregnancy Guideline Working Group, Chan W-S, Kent NE, et al. Venous thromboembolism and antithrombotic therapy in pregnancy. *J Obstet Gynaecol Can* 2014;36:527-53.

99. McIntock C, Brighton T, Chunilal S, Dekker G, McDonnell N, McRae S, et al. Recommendations for the diagnosis and treatment of deep venous thrombosis and pulmonary embolism in pregnancy and the postpartum period. *Aust N Z J Obstet Gynaecol* 2012;52:14-22.
100. Marshall AL. Diagnosis, treatment, and prevention of venous thromboembolism in pregnancy. *Postgrad Med* 2014;126:25-34.
101. Anderson PO. Anticoagulants and breastfeeding. *Breastfeed Med* 2017;12:77–78.
102. Cohen H, Arachchilage DR, Middeldorp S, Beyer-Westendorf J, Abdul-Kadir R. Management of direct oral anticoagulants in women of childbearing potential: guidance from the SSC of the ISTH. *J Thromb Haemost* 2016;14:1673-6.
103. Voke J, Keidan J, Pavord S, Spencer NH, Hunt BJ, British Society for Haematology Obstetric Haematology Group. The management of antenatal venous thromboembolism in the UK and Ireland: a prospective multicentre observational survey. *Br J Haematol* 2007;139:545-58.
104. Smith MP, Norris LA, Steer PJ, Savidge GF, Bonnar J. Tinzaparin sodium for thrombosis treatment and prevention during pregnancy. *Am J Obstet Gynecol* 2004;190:495-501.
105. Ní Ainle F, Wong A, Appleby N, Byrne B, Regan C, Hassan T, et al. Efficacy and safety of once daily low molecular weight heparin (tinzaparin sodium) in high risk pregnancy. *Blood Coagul Fibrinolysis* 2008;19:689-92.
106. Linkins L-A, Dans AL, Moores LK, Bona R, Davidson BL, Schulman S, et al. Treatment and prevention of heparin-induced thrombocytopenia: Antithrombotic Therapy and Prevention of Thrombosis, 9th ed: American College of Chest Physicians Evidence-Based Clinical Practice Guidelines. *Chest* 2012;141:e495S-e530S.
107. Watson H, Davidson S, Keeling D, Haemostasis and Thrombosis Task Force of the British Committee for Standards in Haematology. Guidelines on the diagnosis and

management of heparin-induced thrombocytopenia: second edition. *Br J Haematol* 2012;159:528-40.

108. Bates SM, Middeldorp S, Rodger M, James AH, Greer I. Guidance for the treatment and prevention of obstetric-associated venous thromboembolism. *J Thromb Thrombolysis* 2016;41:92-128.
109. Llanos C, Friedman DM, Saxena A, Izmirly PM, Tseng C-E, Dische R, et al. Anatomical and pathological findings in hearts from fetuses and infants with cardiac manifestations of neonatal lupus. *Rheumatol (Oxford)* 2012;51:1086-92.
110. Brucato A, Frassi M, Franceschini F, Cimaz R, Faden D, Pisoni MP, et al. Risk of congenital complete heart block in newborns of mothers with anti-Ro/SSA antibodies detected by counterimmunoelectrophoresis: a prospective study of 100 women. *Arthritis Rheum* 2001;44:1832-5.
111. Buyon JP, Hiebert R, Copel J, Craft J, Friedman D, Katholi M, et al. Autoimmune-associated congenital heart block: demographics, mortality, morbidity and recurrence rates obtained from a national neonatal lupus registry. *J Am Coll Cardiol* 1998;31:1658-66.
112. Llanos C, Izmirly PM, Katholi M, Clancy RM, Friedman DM, Kim MY, et al. Recurrence rates of cardiac manifestations associated with neonatal lupus and maternal/fetal risk factors. *Arthritis Rheum* 2009;60:3091-7.
113. Brito-Zerón P, Izmirly PM, Ramos-Casals M, Buyon JP, Khamashta MA. Autoimmune congenital heart block: complex and unusual situations. *Lupus* 2016;25:116-28.
114. Izmirly PM, Saxena A, Kim MY, Wang D, Sahl SK, Llanos C, et al. Maternal and fetal factors associated with mortality and morbidity in a multi-racial/ethnic registry of anti-SSA/Ro-associated cardiac neonatal lupus. *Circulation* 2011;124:1927-35.

115. Friedman DM, Rupel A, Buyon JP. Epidemiology, etiology, detection, and treatment of autoantibody-associated congenital heart block in neonatal lupus. *Curr Rheumatol Rep* 2007;9:101-8.
116. Izmirly PM, Kim MY, Llanos C, Le PU, Guerra MM, Askanase AD, et al. Evaluation of the risk of anti-SSA/Ro-SSB/La antibody-associated cardiac manifestations of neonatal lupus in fetuses of mothers with systemic lupus erythematosus exposed to hydroxychloroquine. *Ann Rheum Dis* 2010;69:1827-30.
117. Izmirly PM, Costedoat-Chalumeau N, Pisoni CN, Khamashta MA, Kim MY, Saxena A, et al. Maternal use of hydroxychloroquine is associated with a reduced risk of recurrent anti-SSA/Ro-antibody-associated cardiac manifestations of neonatal lupus. *Circulation* 2012;126:76-82.
118. Tunks RD, Clowse MEB, Miller SG, Brancazio LR, Barker PCA. Maternal autoantibody levels in congenital heart block and potential prophylaxis with antiinflammatory agents. *Am J Obstet Gynecol* 2013;208:64.e1-7.
119. Friedman DM, Kim MY, Copel JA, Davis C, Phoon CKL, Glickstein JS, et al. Utility of cardiac monitoring in fetuses at risk for congenital heart block: the PR Interval and Dexamethasone Evaluation (PRIDE) prospective study. *Circulation* 2008;117:485-93.
120. Brito-Zerón P, Izmirly PM, Ramos-Casals M, Buyon JP, Khamashta MA. The clinical spectrum of autoimmune congenital heart block. *Nat Rev Rheumatol* 2015;11:301-12.
121. Jaeggi E, Laskin C, Hamilton R, Kingdom J, Silverman E. The importance of the level of maternal anti-Ro/SSA antibodies as a prognostic marker of the development of cardiac neonatal lupus erythematosus a prospective study of 186 antibody-exposed fetuses and infants. *J Am Coll Cardiol* 2010;55:2778-84.
122. Spence D, Hornberger L, Hamilton R, Silverman ED. Increased risk of complete congenital heart block in infants born to women with hypothyroidism and anti-Ro and/or anti-La antibodies. *J Rheumatol* 2006;33:167-70.

123. Ambrosi A, Salomonsson S, Eliasson H, Zeffer E, Skog A, Dzikaite V, et al.  
Development of heart block in children of SSA/SSB-autoantibody-positive women is associated with maternal age and displays a season-of-birth pattern. *Ann Rheum Dis* 2012;71:334-40.
124. Donofrio MT, Moon-Grady AJ, Hornberger LK, Copel JA, Sklansky MS, Abuhamad A, et al. Diagnosis and treatment of fetal cardiac disease: a scientific statement from the American Heart Association. *Circulation* 2014;129:2183-242.
125. Glickstein JS, Buyon J, Friedman D. Pulsed Doppler echocardiographic assessment of the fetal PR interval. *Am J Cardiol* 2000;86:236-9.
126. Sonesson S-E, Salomonsson S, Jacobsson L-A, Bremme K, Wahren-Herlenius M.  
Signs of first-degree heart block occur in one-third of fetuses of pregnant women with anti-SSA/Ro 52-kd antibodies. *Arthritis Rheum* 2004;50:1253-61.
127. Rein AJT, Mevorach D, Perles Z, Gavri S, Nadjari M, Nir A, et al. Early diagnosis and treatment of atrioventricular block in the fetus exposed to maternal anti-SSA/Ro-SSB/La antibodies: a prospective, observational, fetal kinetocardiogram-based study. *Circulation* 2009;119:1867-72.
128. Nii M, Hamilton RM, Fenwick L, Kingdom JCP, Roman KS, Jaeggi ET. Assessment of fetal atrioventricular time intervals by tissue Doppler and pulse Doppler echocardiography: normal values and correlation with fetal electrocardiography. *Heart* 2006;92:1831-7.
129. Rosenthal D, Druzin M, Chin C, Dubin A. A new therapeutic approach to the fetus with congenital complete heart block: preemptive, targeted therapy with dexamethasone. *Obstet Gynecol* 1998;92:689-91.
130. Cuneo BF, Lee M, Roberson D, Niksch A, Ovadia M, Parilla BV, et al. A management strategy for fetal immune-mediated atrioventricular block. *J Matern-Fetal Neonatal Med Off J Eur Assoc Perinat Med Fed Asia Ocean Perinat Soc Int Soc Perinat Obstet* 2010;23:1400-5.

131. Jaeggi ET, Fouron J-C, Silverman ED, Ryan G, Smallhorn J, Hornberger LK. Transplacental fetal treatment improves the outcome of prenatally diagnosed complete atrioventricular block without structural heart disease. *Circulation* 2004;110:1542-8.
132. Izmirly PM, Buyon JP, Saxena A. Neonatal lupus: advances in understanding pathogenesis and identifying treatments of cardiac disease. *Curr Opin Rheumatol* 2012;24:466-72.
133. Izmirly PM, Rivera TL, Buyon JP. Neonatal lupus syndromes. *Rheum Dis Clin North Am* 2007;33:267-85, vi.
134. Saleeb S, Copel J, Friedman D, Buyon JP. Comparison of treatment with fluorinated glucocorticoids to the natural history of autoantibody-associated congenital heart block: retrospective review of the research registry for neonatal lupus. *Arthritis Rheum* 1999;42:2335-45.
135. Eliasson H, Sonesson S-E, Sharland G, Granath F, Simpson JM, Carvalho JS, et al. Isolated atrioventricular block in the fetus: a retrospective, multinational, multicenter study of 175 patients. *Circulation* 2011;124:1919-26.
136. Levesque K, Morel N, Maltret A, Baron G, Masseau A, Orquevaux P, et al. Description of 214 cases of autoimmune congenital heart block: Results of the French neonatal lupus syndrome. *Autoimmun Rev* 2015;14:1154-60.
137. Izmirly PM, Saxena A, Sahl SK, Shah U, Friedman DM, Kim MY, et al. Assessment of fluorinated steroids to avert progression and mortality in anti-SSA/Ro-associated cardiac injury limited to the fetal conduction system. *Ann Rheum Dis* 2016;75:1161-5.
138. Trucco SM, Jaeggi E, Cuneo B, Moon-Grady AJ, Silverman E, Silverman N, et al. Use of intravenous gamma globulin and corticosteroids in the treatment of maternal autoantibody-mediated cardiomyopathy. *J Am Coll Cardiol* 2011;57:715-23.
139. Martin TA. Congenital heart block: current thoughts on management, morphologic spectrum, and role of intervention. *Cardiol Young* 2014;24:41-6.

140. Jaeggi ET, Silverman ED, Laskin C, Kingdom J, Golding F, Weber R. Prolongation of the atrioventricular conduction in fetuses exposed to maternal anti-Ro/SSA and anti-La/SSB antibodies did not predict progressive heart block. A prospective observational study on the effects of maternal antibodies on 165 fetuses. *J Am Coll Cardiol* 2011;57:1487-92.
141. Carolis SD, Salvi S, Botta A, Santucci S, Martino C, Garofalo S, et al. Which Intrauterine Treatment for Autoimmune Congenital Heart Block? *Open Autoimmun J* 2010;2:1-10
142. Buyon JP, Clancy RM, Friedman DM. Autoimmune associated congenital heart block: integration of clinical and research clues in the management of the maternal / foetal dyad at risk. *J Intern Med* 2009;265:653-62.
143. Pisoni CN, Brucato A, Ruffatti A, Espinosa G, Cervera R, Belmonte-Serrano M, et al. Failure of intravenous immunoglobulin to prevent congenital heart block: Findings of a multicenter, prospective, observational study. *Arthritis Rheum* 2010;62:1147-52.
144. Sterling R-A, Carlin A. Prevention of recurrent congenital heart block in a SSA/SSB positive mother using high dose maternal IVIG from 16-week gestation. *Prenat Diagn* 2015;35:1148-50.
145. Friedman DM, Llanos C, Izmirly PM, Brock B, Byron J, Copel J, et al. Evaluation of fetuses in a study of intravenous immunoglobulin as preventive therapy for congenital heart block: Results of a multicenter, prospective, open-label clinical trial. *Arthritis Rheum* 2010;62:1138-46.
146. Ruffatti A, Milanesi O, Chiandetti L, Cerutti A, Gervasi MT, De Silvestro G, et al. A combination therapy to treat second-degree anti-Ro/La-related congenital heart block: a strategy to avoid stable third-degree heart block? *Lupus* 2012;21:666-71.
147. Ruffatti A, Cerutti A, Favaro M, Del Ross T, Calligaro A, Hoxha A, et al. Plasmapheresis, intravenous immunoglobulins and bethametasone - a combined protocol to treat autoimmune congenital heart block: a prospective cohort study. *Clin Exp Rheumatol* 2016;34:706-13.

148. Tonello M, Ruffatti A, Marson P, Tison T, Marozio L, Hoxha A, et al. Plasma exchange effectively removes 52- and 60-kDa anti-Ro/SSA and anti-La/SSB antibodies in pregnant women with congenital heart block. *Transfusion (Paris)* 2015;55:1782-6.
149. Martínez-Sánchez N, Robles-Marhuenda Á, Álvarez-Doforno R, Viejo A, Antolín-Alvarado E, Deirós-Bronte L, et al. The effect of a triple therapy on maternal anti-Ro/SS-A levels associated to fetal cardiac manifestations. *Autoimmun Rev* 2015;14:423-8.
150. Crowley P. Prophylactic corticosteroids for preterm birth. *Cochrane Database Syst Rev* 2000;CD000065.
151. Brownfoot FC, Crowther CA, Middleton P. Different corticosteroids and regimens for accelerating fetal lung maturation for women at risk of preterm birth. *Cochrane Database Syst Rev* 2008;CD006764.
152. Urban R, Lemancewicz A, Przepieść J, Urban J, Kretowska M. Antenatal corticosteroid therapy: a comparative study of dexamethasone and betamethasone effects on fetal Doppler flow velocity waveforms. *Eur J Obstet Gynecol Reprod Biol.* 2005;120:170-4.
153. Lee BH, Stoll BJ, McDonald SA, Higgins RD, National Institute of Child Health and Human Development Neonatal Research Network. Neurodevelopmental outcomes of extremely low birth weight infants exposed prenatally to dexamethasone versus betamethasone. *Pediatrics* 2008;121:289-96.
154. O’Gorman N, Wright D, Syngelaki A, Akolekar R, Wright A, Poon LC, et al. Competing risks model in screening for preeclampsia by maternal factors and biomarkers at 11-13 weeks gestation. *Am J Obstet Gynecol* 2016;214:103.e1-103.e12.
155. Wright D, Akolekar R, Syngelaki A, Poon LCY, Nicolaides KH. A competing risks model in early screening for preeclampsia. *Fetal Diagn Ther* 2012;32:171-8.

156. Gabbay-Benziv R, Oliveira N, Baschat AA. Optimal first trimester preeclampsia prediction: a comparison of multimarker algorithm, risk profiles and their sequential application. *Prenat Diagn* 2016;36:34-9.
157. Akolekar R, Syngelaki A, Poon L, Wright D, Nicolaides KH. Competing risks model in early screening for preeclampsia by biophysical and biochemical markers. *Fetal Diagn Ther* 2013;33:8-15.
158. Poon LCY, Syngelaki A, Akolekar R, Lai J, Nicolaides KH. Combined screening for preeclampsia and small for gestational age at 11-13 weeks. *Fetal Diagn Ther* 2013;33:16-27.
159. Thilaganathan B, Wormald B, Zanardini C, Sheldon J, Ralph E, Papageorgiou AT. Early-pregnancy multiple serum markers and second-trimester uterine artery Doppler in predicting preeclampsia. *Obstet Gynecol* 2010;115:1233-8.
160. Scazzocchio E, Crovetto F, Triunfo S, Gratacós E, Figueras F. Validation of a first-trimester screening model for pre-eclampsia in an unselected population. *Ultrasound Obstet Gynecol* 2017;49:188-93.
161. Rolnik DL, Wright D, Poon LCY, Syngelaki A, O’Gorman N, de Paco Matallana C, et al. ASPRE trial: performance of screening for preterm pre-eclampsia. *Ultrasound Obstet Gynecol* 2017;50:492-5.
162. WHO Recommendations for Prevention and Treatment of Pre-Eclampsia and Eclampsia. Geneva: World Health Organization; 2011. (WHO Guidelines Approved by the Guidelines Review Committee). <http://www.ncbi.nlm.nih.gov/books/NBK140561/>
163. Lowe SA, Bowyer L, Lust K, McMahon LP, Morton M, North RA, et al. SOMANZ guidelines for the management of hypertensive disorders of pregnancy 2014. *Aust N Z J Obstet Gynaecol* 2015;55:e1-29.
164. LeFevre ML, U.S. Preventive Services Task Force. Low-dose aspirin use for the prevention of morbidity and mortality from preeclampsia: U.S. Preventive Services Task Force recommendation statement. *Ann Intern Med* 2014;161:819-26.

165. Magee LA, Pels A, Helewa M, Rey E, von Dadelszen P, SOGC Hypertension Guideline Committee. Diagnosis, evaluation, and management of the hypertensive disorders of pregnancy: executive summary. *J Obstet Gynaecol Can* 2014;36:575-6.
166. Buyon JP, Kim MY, Guerra MM, Laskin CA, Petri M, Lockshin MD, et al. Predictors of Pregnancy Outcomes in Patients With Lupus: A Cohort Study. *Ann Intern Med* 2015;163:153-63.
167. Chakravarty EF, Colón I, Langen ES, Nix DA, El-Sayed YY, Genovese MC, et al. Factors that predict prematurity and preeclampsia in pregnancies that are complicated by systemic lupus erythematosus. *Am J Obstet Gynecol* 2005;192:1897-904.
168. Skorpen CG, Lydersen S, Gilboe I-M, Skomsvoll JF, Salvesen KÅ, Palm Ø, et al. Influence of disease activity and medications on offspring birth weight, pre-eclampsia and preterm birth in systemic lupus erythematosus: a population-based study. *Ann Rheum Dis* 2018;77:264-9.
169. Carmona F, Font J, Moga I, Làzaro I, Cervera R, Pac V, et al. Class III-IV proliferative lupus nephritis and pregnancy: a study of 42 cases. *Am J Reprod Immunol N Y N* 1989 2005;53:182-8.
170. Bramham K, Hunt BJ, Bewley S, Germain S, Calatayud I, Khamashta MA, et al. Pregnancy outcomes in systemic lupus erythematosus with and without previous nephritis. *J Rheumatol*. 2011;jrheum–100997.
171. Duckitt K, Harrington D. Risk factors for pre-eclampsia at antenatal booking: systematic review of controlled studies. *Br Med J* 2005;330:565.
172. Yamada H, Atsumi T, Kobashi G, Ota C, Kato EH, Tsuruga N, et al. Antiphospholipid antibodies increase the risk of pregnancy-induced hypertension and adverse pregnancy outcomes. *J Reprod Immunol* 2009;79:188-95.
173. Yelnik CM, Laskin CA, Porter TF, Branch DW, Buyon JP, Guerra MM, et al. Lupus anticoagulant is the main predictor of adverse pregnancy outcomes in aPL-positive patients: validation of PROMISSE study results. *Lupus Sci Med* 2016;3:e000131.

174. Roberge S, Giguère Y, Villa P, Nicolaides K, Vainio M, Forest J-C, et al. Early Administration of Low-Dose Aspirin for the Prevention of Severe and Mild Preeclampsia: A Systematic Review and Meta-Analysis. *Am J Perinatol* 2012; 29:551-6.
175. Roberge S, Villa P, Nicolaides K, Giguère Y, Vainio M, Bakthi A, et al. Early administration of low-dose aspirin for the prevention of preterm and term preeclampsia: a systematic review and meta-analysis. *Fetal Diagn Ther.* 2012;31:141-6.
176. Duley L, Henderson-Smart DJ, Meher S, King JF. Antiplatelet agents for preventing pre-eclampsia and its complications. *Cochrane Database Syst Rev* 2007;:CD004659.
177. Villa PM, Kajantie E, Räikkönen K, Pesonen A-K, Hämmäläinen E, Vainio M, et al. Aspirin in the prevention of pre-eclampsia in high-risk women: a randomised placebo-controlled PREDO Trial and a meta-analysis of randomised trials. *Br J Obstet Gynaecol* 2013;120:64-74.
178. Roberge S, Nicolaides KH, Demers S, Villa P, Bujold E. Prevention of perinatal death and adverse perinatal outcome using low-dose aspirin: a meta-analysis. *Ultrasound Obstet Gynecol* 2013;41:491-9.
179. Roberge S, Nicolaides K, Demers S, Hyett J, Chaillet N, Bujold E. The role of aspirin dose on the prevention of preeclampsia and fetal growth restriction: systematic review and meta-analysis. *Am J Obstet Gynecol* 2017;216:110-120.e6.
180. Leitich H, Egarter C, Husslein P, Kaider A, Schemper M. A meta-analysis of low dose aspirin for the prevention of intrauterine growth retardation. *Br J Obstet Gynaecol* 1997;104:450-9.
181. Meher S, Duley L, Hunter K, Askie L. Antiplatelet therapy before or after 16 weeks' gestation for preventing preeclampsia: an individual participant data meta-analysis. *Am J Obstet Gynecol* 2017;216:121-128.e2.
182. Yurdakök M. Fetal and neonatal effects of anticoagulants used in pregnancy: a review. *Turk J Pediatr* 2012;54:207-15.

183. Trivedi NA. A meta-analysis of low-dose aspirin for prevention of preeclampsia. *J Postgrad Med* 2011;57:91-5.
184. Nørgård B, Puhó E, Czeizel AE, Skriver MV, Sørensen HT. Aspirin use during early pregnancy and the risk of congenital abnormalities: a population-based case-control study. *Am J Obstet Gynecol* 2005;192:922-3.
185. Di Sessa TG, Moretti ML, Khoury A, Pulliam DA, Arheart KL, Sibai BM. Cardiac function in fetuses and newborns exposed to low-dose aspirin during pregnancy. *Am J Obstet Gynecol* 1994;171:892-900.
186. Velauthar L, Plana MN, Kalidindi M, Zamora J, Thilaganathan B, Illanes SE, et al. First-trimester uterine artery Doppler and adverse pregnancy outcome: a meta-analysis involving 55,974 women. *Ultrasound Obstet Gynecol* 2014;43:500-7.
187. Cnossen JS, Morris RK, ter Riet G, Mol BWJ, van der Post JAM, Coomarasamy A, et al. Use of uterine artery Doppler ultrasonography to predict pre-eclampsia and intrauterine growth restriction: a systematic review and bivariable meta-analysis. *Can Med Assoc J* 2008;178:701-11.
188. Allen RE, Morlando M, Thilaganathan B, Zamora J, Khan KS, Thangaratnam S, et al. Predictive accuracy of second-trimester uterine artery Doppler indices for stillbirth: a systematic review and meta-analysis. *Ultrasound Obstet Gynecol* 2016;47:22-7.
189. Seror J, Verspyck E, Borg J-Y, Berkane N, Marpeau L. [Predictive value of uterine artery velocity waveforms in monitoring of pregnancies with high obstetrical risk antiphospholipid syndrome: the Rouen experience]. *Gynecol Obstet Fertil* 2010;38:447-54.
190. Benifla JL, Tchobroutsky C, Uzan M, Sultan Y, Weill BJ, Laumond-Barney S. Predictive value of uterine artery velocity waveforms in pregnancies complicated by systemic lupus erythematosus and the antiphospholipid syndrome. *Fetal Diagn Ther* 1992;7:195-202.

191. Caruso A, De Carolis S, Ferrazzani S, Valesini G, Caforio L, Mancuso S. Pregnancy outcome in relation to uterine artery flow velocity waveforms and clinical characteristics in women with antiphospholipid syndrome. *Obstet Gynecol* 1993;82:970-7.
192. Farrell T, Dawson T. Can uterine artery Doppler velocimetry predict adverse pregnancy outcome in women with antiphospholipid syndrome? *Acta Obstet Gynecol Scand* 2001;80:609-10.
193. Venkat-Raman N, Backos M, Teoh TG, Lo WT, Regan L. Uterine artery Doppler in predicting pregnancy outcome in women with antiphospholipid syndrome. *Obstet Gynecol* 2001;98:235-42.
194. Bats A-S, Lejeune V, Cynober E, Safar E, Gonzales M, Milliez J, et al. Antiphospholipid syndrome and second- or third-trimester fetal death: follow-up in the next pregnancy. *Eur J Obstet Gynecol Reprod Biol* 2004;114:125-9.
195. López-Farfán JA, Martínez-Marín DG, Van Der Heyden-Pardo T. [Uterine artery score in patients with systemic lupus erythematosus as a predictor of intrauterine growth restriction]. *Ginecol Obstet Mex* 2011;79:137-42.
196. Madazli R, Bulut B, Erenel H, Gezer A, Guralp O. Systemic lupus erythematosus and pregnancy. *J Obstet Gynaecol* 2010;30:17-20.
197. Madazli R, Yuksel MA, Oncul M, Imamoglu M, Yilmaz H. Obstetric outcomes and prognostic factors of lupus pregnancies. *Arch Gynecol Obstet* 2014;289:49-53.
198. Baschat AA. Fetal responses to placental insufficiency: an update. *Br J Obstet Gynaecol* 2004;111:1031-41.
199. Maulik D, Figueroa R. Absent End-Diastolic Velocity in the Umbilical Artery and Its Clinical Significance. *Doppler Ultrasound in Obstetrics and Gynecology* Springer, Berlin, Heidelberg 2005: 375-86. [https://link.springer.com/chapter/10.1007/3-540-28903-8\\_25](https://link.springer.com/chapter/10.1007/3-540-28903-8_25)

200. Baschat AA, Güclü S, Kush ML, Gembruch U, Weiner CP, Harman CR. Venous Doppler in the prediction of acid-base status of growth-restricted fetuses with elevated placental blood flow resistance. *Am J Obstet Gynecol* 2004;191:277-84.
201. Morris RK, Malin G, Robson SC, Kleijnen J, Zamora J, Khan KS. Fetal umbilical artery Doppler to predict compromise of fetal/neonatal wellbeing in a high-risk population: systematic review and bivariate meta-analysis. *Ultrasound Obstet Gynecol* 2011;37:135-42.
202. Baschat AA, Weiner CP. Umbilical artery Doppler screening for detection of the small fetus in need of antepartum surveillance. *Am J Obstet Gynecol* 2000;182:154-8.
203. Burke G, Stuart B, Crowley P, Scanail SN, Drumm J. Is intrauterine growth retardation with normal umbilical artery blood flow a benign condition? *Br Med J*. 1990;300:1044-5.
204. McCowan LM, Harding JE, Roberts AB, Barker SE, Ford C, Stewart AW. A pilot randomized controlled trial of two regimens of fetal surveillance for small-for-gestational-age fetuses with normal results of umbilical artery Doppler velocimetry. *Am J Obstet Gynecol* 2000;182:81-6.
205. Alfirevic Z, Stampalija T, Dowsell T. Fetal and umbilical Doppler ultrasound in high-risk pregnancies. *Cochrane Database Syst Rev* 2017;6:CD007529.
206. Farine D, Granovsky-Grisaru S, Ryan G, Seaward PG, Teoh TG, Laskin C, et al. Umbilical artery blood flow velocity in pregnancies complicated by systemic lupus erythematosus. *J Clin Ultrasound JCU* 1998;26:379-82.

**Tabla 1.** Recomendaciones sobre control del embarazo en pacientes con lupus eritematoso sistémico y síndrome antifosfolípido.

| Recomendación                                                                                                                                                                  | Nivel de acuerdo |         |           |
|--------------------------------------------------------------------------------------------------------------------------------------------------------------------------------|------------------|---------|-----------|
|                                                                                                                                                                                | Media (DE)       | Mediana | % Acuerdo |
| <b>1.- Seguimiento básico del embarazo</b>                                                                                                                                     |                  |         |           |
| <b>1. A. ¿Cuál es el perfil básico de seguimiento de embarazo en LES y/o SAF?</b>                                                                                              |                  |         |           |
| - Se sugiere realizar visita, como mínimo, cada 4 semanas hasta la semana 36, quincenal hasta la semana 38 y posteriormente semanales. <b>[NE 4, GR D].</b>                    | 9.78 (0.41)      | 10      | 100%      |
| - En caso de actividad de la enfermedad o complicaciones obstétricas, se sugiere adecuar el seguimiento según la situación clínica. <b>[NE 4, GR D].</b>                       | 10 (0.00)        | 10      | 100%      |
| - En cada visita se sugiere, además de realizar una evaluación clínica, la toma de tensión arterial y peso. <b>[NE 4, GR D].</b>                                               | 10 (0.00)        | 10      | 100%      |
| - Se sugiere incluir en el protocolo de analíticas del seguimiento de la gestación, las determinaciones necesarias de evaluación de la actividad según la situación clínica de | 10 (0.00)        | 10      | 100%      |

|                                                                                                                                                                                                                                                                         |             |    |      |
|-------------------------------------------------------------------------------------------------------------------------------------------------------------------------------------------------------------------------------------------------------------------------|-------------|----|------|
| la paciente incluyendo en cada visita un sedimento de orina con proteinuria, o al menos, una tira de orina. <b>[NE 4, GR D].</b>                                                                                                                                        |             |    |      |
| - Se recomienda la realización de cribado de defectos de placentación incluyendo doppler de arterias uterinas en la primera mitad de la gestación. <b>[NE 1++, GR A].</b>                                                                                               | 10 (0.00)   | 10 | 100% |
| - Se sugiere realizar ecografías seriadas cada 4 semanas a partir de semana 24 para control del crecimiento fetal. <b>[NE 4, GR D].</b>                                                                                                                                 | 10 (0.00)   | 10 | 100% |
| <b>1. B. ¿En qué situaciones clínicas concretas hay que ampliar el seguimiento?</b>                                                                                                                                                                                     |             |    |      |
| - En las pacientes con LES y antecedente de nefritis lúpica, se sugiere añadir al seguimiento básico la determinación de ratio proteína-creatinina (P/C) con cada analítica y si resultase patológico valorar la confirmación con proteinuria 24h. <b>[NE 4, GR D].</b> | 9.85 (0.34) | 10 | 100% |
| - En las pacientes con anticuerpos antifosfolípido, no se recomienda de forma rutinaria realizar monitorización de niveles de los mismos durante la gestación. <b>[NE 4, GRV].</b>                                                                                      | 10 (0.00)   | 10 | 100% |
| - En las pacientes con anticuerpos anti-Ro/SS-A y/o anti-La/SS-B, al seguimiento básico de la paciente con LES se aconseja añadir la realización de ecocardiografía fetal periódica al menos entre las semanas 16-18 y 30-34. <b>[NE 4, GR D].</b>                      | 9.92 (0.25) | 10 | 100% |

|                                                                                                                                                                                                                          |             |    |      |
|--------------------------------------------------------------------------------------------------------------------------------------------------------------------------------------------------------------------------|-------------|----|------|
| - En las pacientes con anticuerpos anti-Ro/SS-A y/o anti-La/SS-B, no existe evidencia sobre la pauta precisa de periodicidad para realizar la ecocardiografía fetal. <b>[GR v]</b> .                                     | 9.92 (0.25) | 10 | 100% |
| <b>2.- Actividad lúpica</b>                                                                                                                                                                                              |             |    |      |
| <b>2.A. ¿Qué glucocorticoides usar y a qué dosis?</b>                                                                                                                                                                    |             |    |      |
| - Se recomienda la utilización de GC no fluorados, especialmente prednisona y metilprednisolona, para el tratamiento materno durante la gestación. <b>[NE1++, GR A]</b> .                                                | 10 (0.00)   | 10 | 100% |
| - Se sugiere el uso de GC orales (prednisona/metilprednisolona) preferiblemente a dosis que no superen los 20 mg al día de inicio en manifestaciones graves y 7,5 mg/día en manifestaciones leves. <b>(NE 4, GR v)</b> . | 9.78 (0.55) | 10 | 100% |
| - Se sugiere el uso de bolus de metilprednisolona intravenosos (iv) durante la gestación en casos de afectación moderada-grave. <b>(NE 4, GR D)</b> .                                                                    | 9.85 (0.34) | 10 | 100% |
| <b>2.B. ¿Qué otros inmunosupresores se pueden emplear en caso de brote y a qué dosis?</b>                                                                                                                                |             |    |      |
| - Se recomienda el uso de azatioprina (AZA) fundamentalmente en brotes moderados y/o graves, a dosis menor o igual a 2 mg/kg. <b>(NE 2++ GRB)</b> .                                                                      | 9.92 (0.25) | 10 | 100% |
| - Se sugiere el uso de ciclosporina <b>(NE 2++ GRB)</b> y tacrolimus <b>(NE 2- GRD)</b> en brotes                                                                                                                        | 9.92 (0.25) | 10 | 100% |

|                                                                                                                                                                                                                           |             |    |      |
|---------------------------------------------------------------------------------------------------------------------------------------------------------------------------------------------------------------------------|-------------|----|------|
| moderados/graves, particularmente en casos de nefritis, a la menor dosis posible según niveles séricos, con monitorización de la tensión arterial, función renal y glucemia.                                              |             |    |      |
| - Se sugiere el uso de inmunoglobulinas iv (IVIG) en situaciones refractarias a tratamiento inmunosupresor y/o para ganar tiempo de gestación. <b>(NE3 GRD)</b> .                                                         | 9.85 (0.34) | 10 | 100% |
| - El uso de ciclofosfamida (CFM) está en principio desaconsejado, y sólo se sugiere en casos de actividad grave refractaria de la enfermedad con riesgo vital materno a partir del segundo trimestre. <b>(NE2+ GRC)</b> . | 9.92 (0.25) | 10 | 100% |
| - De forma excepcional, puede considerarse el uso del Rituximab en el 1er trimestre. Se desaconseja en fases más avanzadas debido al riesgo de depleción de células B en el neonato. <b>(NE3 GRD)</b> .                   | 9.85 (0.34) | 10 | 100% |
| <b>2.C. ¿Cuáles son las diferencias en la aproximación terapéutica en función del perfil clínico?</b>                                                                                                                     |             |    |      |
| - En todas las pacientes con LES, se recomienda NO SUSPENDER la hidroxicloroquina (HCQ) durante el embarazo. <b>(NE 2++, GR B)</b> .                                                                                      | 10 (0.00)   | 10 | 100% |
| - En las pacientes serológicamente activas, pero clínicamente inactivas, se sugiere no iniciar o intensificar el tratamiento. <b>(NE 4, GR v)</b> .                                                                       | 10 (0.00)   | 10 | 100% |

|                                                                                                                                                                                                                                                                                                                                                                                                        |             |    |      |
|--------------------------------------------------------------------------------------------------------------------------------------------------------------------------------------------------------------------------------------------------------------------------------------------------------------------------------------------------------------------------------------------------------|-------------|----|------|
| - En las pacientes con brotes leves (artralgias, lesiones cutáneas lúpicas localizadas como rash malar o lesiones discoides únicas), se sugiere añadir GC a dosis bajas (5-7,5 mg/día) al tratamiento de base con HCQ. <b>(NE 4, GR v).</b>                                                                                                                                                            | 9.85 (0.51) | 10 | 100% |
| - En las pacientes con brotes leves (artralgias, lesiones cutáneas lúpicas localizadas como rash malar o lesiones discoides únicas), se sugiere la reducción progresiva de la dosis de GC hasta alcanzar una dosis de mantenimiento menor o igual a 5 mg/día. <b>(NE 4, GR v).</b>                                                                                                                     | 9.85 (0.51) | 10 | 100% |
| - En las pacientes con brotes leves (artralgias, lesiones cutáneas lúpicas localizadas como rash malar o lesiones discoides únicas), se desaconseja el tratamiento mantenido con AINE debido fundamentalmente a los riesgos maternos de hipertensión arterial, efectos gastrolesivos, daño renal y hepatotoxicidad con las dosis habitualmente utilizadas en la práctica clínica. <b>(NE 4, GR v).</b> | 9.85 (0.51) | 10 | 100% |
| - En las pacientes con brotes leves (artralgias, lesiones cutáneas lúpicas localizadas como rash malar o lesiones discoides únicas), se sugiere evitar el uso de AINE después de la semana 30 de gestación por el riesgo de oligohidramnios y cierre del ductus arterioso. <b>(NE3 GR D).</b>                                                                                                          | 10 (0.00)   | 10 | 100% |
| - En las pacientes con brotes moderados (poliartritis, trombopenia moderada, anemia hemolítica con baja tasa de hemólisis, lesiones lúpicas extensas, pericarditis/derrame pericárdico no grave, derrame pleural, vasculitis cutánea, brote leve que no responde al tratamiento aconsejado), se sugiere el empleo de pulsos de metilprednisolona 125                                                   | 9.78 (0.55) | 10 | 100% |

|                                                                                                                                                                                                                                                                                                                                                                                                                                                                                                       |             |    |      |
|-------------------------------------------------------------------------------------------------------------------------------------------------------------------------------------------------------------------------------------------------------------------------------------------------------------------------------------------------------------------------------------------------------------------------------------------------------------------------------------------------------|-------------|----|------|
| mg (de 1 a 3 días consecutivos), seguido de prednisona a dosis inicial máxima de 5-10 mg/día tras finalizar los pulsos. <b>(NE 4, GR v).</b>                                                                                                                                                                                                                                                                                                                                                          |             |    |      |
| - En las pacientes con brotes moderados (poliartritis, trombopenia moderada, anemia hemolítica con baja tasa de hemólisis, lesiones lúpicas extensas, pericarditis/derrame pericárdico no grave, derrame pleural, vasculitis cutánea, brote leve que no responde al tratamiento aconsejado), si la persistencia de la sintomatología no permitiese el descenso de la dosis de corticoides, se recomienda la adición de azatioprina. <b>(NE 2++, GR B).</b>                                            | 9.85 (0.51) | 10 | 100% |
| - En las pacientes con brotes moderados (poliartritis, trombopenia moderada, anemia hemolítica con baja tasa de hemólisis, lesiones lúpicas extensas, pericarditis/derrame pericárdico no grave, derrame pleural, vasculitis cutánea, brote leve que no responde al tratamiento aconsejado), en caso de intolerancia a azatioprina, se sugiere el uso de anticalcineurínicos. <b>(NE 4, GR v).</b>                                                                                                    | 9.85 (0.51) | 10 | 100% |
| - En las pacientes con brotes graves (nefritis proliferativa, neumonitis lúpica, trombopenia grave, anemia hemolítica con alta tasa de hemólisis, derrame pericárdico severo, derrame pleural refractario, manifestaciones neuropsiquiátricas graves), se sugiere el uso precoz de pulsos de metilprednisolona 125, 250 ó 500 mg en función de la gravedad del caso (3 días consecutivos) seguida de prednisona oral a dosis máxima de 20-30 mg/día con descenso quincenal 20-15-10-7,5-5mg/día hasta | 9.78 (0.55) | 10 | 100% |

|                                                                                                                                                                                                                                                                                                                                                                                                                                                   |             |    |      |
|---------------------------------------------------------------------------------------------------------------------------------------------------------------------------------------------------------------------------------------------------------------------------------------------------------------------------------------------------------------------------------------------------------------------------------------------------|-------------|----|------|
| alcanzar la dosis objetivo de mantenimiento menor o igual a 5 mg/día. <b>(NE 2-, GR v).</b>                                                                                                                                                                                                                                                                                                                                                       |             |    |      |
| - En las pacientes con brotes graves (nefritis proliferativa, neumonitis lúpica, trombopenia grave, anemia hemolítica con alta tasa de hemólisis, derrame pericárdico severo, derrame pleural refractario, manifestaciones neuropsiquiátricas graves), sugerimos el uso de IVIG (0,4 g/kg x 5 días), tras la administración de los pulsos de metilprednisolona, realizando un balance individualizado del riesgo trombótico. <b>(NE 4, GR D).</b> | 9.50 (0.90) | 10 | 100% |
| - En las pacientes con brotes graves (nefritis proliferativa, neumonitis lúpica, trombopenia grave, anemia hemolítica con alta tasa de hemólisis, derrame pericárdico severo, derrame pleural refractario, manifestaciones neuropsiquiátricas graves), se sugiere la administración desde el inicio de inmunosupresores ahorradores de corticoides (azatioprina, ciclosporina, tacrolimus). <b>(NE4, GR v).</b>                                   | 9.92 (0.25) | 10 | 100% |
| - En las pacientes con brotes graves (nefritis proliferativa, neumonitis lúpica, trombopenia grave, anemia hemolítica con alta tasa de hemólisis, derrame pericárdico severo, derrame pleural refractario, manifestaciones neuropsiquiátricas graves), el uso de CFM está en principio desaconsejado, y sólo se sugiere en casos de actividad orgánica grave refractaria o riesgo vital materno, a partir del 2º trimestre. <b>(NE2+, GR C).</b>  | 9.92 (0.25) | 10 | 100% |
| - En las pacientes con brotes graves (nefritis proliferativa, neumonitis lúpica, trombopenia grave, anemia hemolítica con alta tasa de hemólisis, derrame                                                                                                                                                                                                                                                                                         | 9.85 (0.34) | 10 | 100% |

|                                                                                                                                                                                                                                                                                                                                                                                                                                                                                    |             |    |      |
|------------------------------------------------------------------------------------------------------------------------------------------------------------------------------------------------------------------------------------------------------------------------------------------------------------------------------------------------------------------------------------------------------------------------------------------------------------------------------------|-------------|----|------|
| pericárdico severo, derrame pleural refractario, manifestaciones neuropsiquiátricas graves), de forma excepcional, puede considerarse el uso del rituximab en el 1er trimestre. Se desaconseja en fases más avanzadas debido al riesgo de depleción de células B en el neonato. <b>(NE3, GR D).</b>                                                                                                                                                                                |             |    |      |
| <b>2.D. ¿Tienen las escalas de actividad lúpica aplicabilidad/utilidad durante el embarazo?</b><br>- No se recomienda el uso de escalas de actividad en la práctica clínica. <b>(NE4, GR D).</b>                                                                                                                                                                                                                                                                                   | 9.85 (0.34) | 10 | 100% |
| <b>3. Nefritis lúpica (NL)</b>                                                                                                                                                                                                                                                                                                                                                                                                                                                     |             |    |      |
| <b>3.A. ¿Cómo se diagnostica la NL durante la gestación?</b>                                                                                                                                                                                                                                                                                                                                                                                                                       |             |    |      |
| - Se sugiere utilizar los mismos criterios que en las pacientes no gestantes: <b>(NE 4 GR D).</b><br><br>-Proteinuria >0.5g/día, ratio proteína/creatinina >0.5 o empeoramiento de la proteinuria basal (aumento de 2g/día si proteinuria basal <3g/día o el doble de la proteinuria basal, si previa en rango nefrótico) y/o<br><br>-Deterioro inexplicado de la función renal (aumento de la Cr basal >30%) y/o<br><br>-Sedimento activo (microhematuria, piuria, cilindruria)." | 10 (0.00)   | 10 | 100% |
| - Se sugiere evitar el uso del sedimento activo como marcador exclusivo de actividad                                                                                                                                                                                                                                                                                                                                                                                               | 9.92 (0.25) | 10 | 100% |

|                                                                                                                                                                                                                                                                                                                                       |             |    |      |
|---------------------------------------------------------------------------------------------------------------------------------------------------------------------------------------------------------------------------------------------------------------------------------------------------------------------------------------|-------------|----|------|
| renal, ya que existe un incremento de las infecciones de orina durante el embarazo.<br><b>(NE 4 GR D).</b>                                                                                                                                                                                                                            |             |    |      |
| - Se sugiere realizar biopsia renal para el diagnóstico definitivo de NL. <b>(NE 3 GR D).</b>                                                                                                                                                                                                                                         | 9.42 (0.97) | 10 | 100% |
| <b>3.B. ¿Se puede realizar una biopsia renal en la gestación? ¿Cuándo estaría indicada?</b>                                                                                                                                                                                                                                           |             |    |      |
| - Se sugiere realizar biopsia renal antes de las 32 semanas de gestación (SG), en pacientes en las que no exista contraindicación, cuando la sospecha clínica no sea suficiente o no haya una respuesta adecuada al tratamiento. <b>(NE 3 GR D).</b>                                                                                  | 9.50 (0.98) | 10 | 100% |
| <b>3.C. ¿Cómo llevar a cabo el diagnóstico diferencial de la NL con la preeclampsia (PE)?</b>                                                                                                                                                                                                                                         |             |    |      |
| - Se sugiere realizar una biopsia renal para el diagnóstico definitivo. <b>(NE 3 GRD).</b>                                                                                                                                                                                                                                            | 9.42 (0.97) | 10 | 100% |
| - Se sugiere la determinación de niveles de factores de complemento, anti-dsDNA y sedimento urinario y la valoración clínica como apoyo en la sospecha de NL. <b>(NE3 GR D).</b>                                                                                                                                                      | 10 (0.00)   | 10 | 100% |
| - Aunque no se puede establecer una recomendación actualmente, los marcadores de angiogénesis como el ratio entre “soluble fms-like tyrosine kinase 1 / Placental growth factor” (sFlt-1/PlGF) y/o endoglina y la medición por Doppler del índice de pulsatilidad medio en las arterias uterinas (mUtA-PI) podrían ser útiles para el | 9.64 (0.71) | 10 | 100% |

|                                                                                                                                                                                                                                   |             |    |        |
|-----------------------------------------------------------------------------------------------------------------------------------------------------------------------------------------------------------------------------------|-------------|----|--------|
| diagnóstico precoz de PE en pacientes con LES y SAF. <b>(NE 2++)</b> .                                                                                                                                                            |             |    |        |
| <b>3.D. ¿Cuál es el tratamiento de la NL durante la gestación?</b>                                                                                                                                                                |             |    |        |
| - En el manejo inicial de los brotes de NL, se sugiere el uso de pulsos de metilprednisolona (250-500 mg/día durante 3 días consecutivos) seguido de dosis de prednisona o equivalente $\leq 30$ mg/día. <b>(NE2++ GRC)</b> .     | 9.85 (0.51) | 10 | 100%   |
| - La pauta de descenso de esteroides se realizará como se recomienda en el manejo de los brotes graves (ver en apartado de manejo de actividad).                                                                                  | 9.85 (0.51) | 10 | 100%   |
| - Se sugiere añadir desde el inicio aquellos tratamientos que sean compatibles con el embarazo como HCQ, azatioprina, anticalcineurínicos e IVIG, solos o en combinación en función de la gravedad del cuadro. <b>(NE3 GRC)</b> . | 9.92 (0.25) | 10 | 100%   |
| - Se sugiere el uso de AZA como inmunosupresor de elección para el tratamiento de inducción en las NL que debutan durante el embarazo o para el mantenimiento en las pacientes con diagnóstico previo. <b>(NE 3 GRC)</b> .        | 9.85 (0.51) | 10 | 100%   |
| - Se desaconseja el uso de CFM. Sólo se debería considerar su uso en casos de actividad grave refractaria o riesgo vital materno, a partir del 2º trimestre. <b>(NE2 GR D)</b> .                                                  | 9.92 (0.25) | 10 | 100%   |
| - Se sugiere el uso de plasmaféresis o inmunoadsorción en los casos refractarios a                                                                                                                                                | 9.28 (1.16) | 10 | 92.85% |

|                                                                                                                                                                                                                                                                                                  |             |    |        |
|--------------------------------------------------------------------------------------------------------------------------------------------------------------------------------------------------------------------------------------------------------------------------------------------------|-------------|----|--------|
| todas las terapias previas. <b>(NE 3 GRC).</b>                                                                                                                                                                                                                                                   |             |    |        |
| - Los inhibidores de la enzima convertidora de angiotensina (IECA) o antagonista del receptor de angiotensina II (ARA-II) están contraindicados durante el embarazo, por lo que para el control de la TA se sugiere el uso de nifedipino, labetalol, hidralacina o metildopa. <b>(NE 3 GRC).</b> | 10 (0.00)   | 10 | 100%   |
| <b>4. Manejo de complicaciones en gestantes con SAF/AAF</b>                                                                                                                                                                                                                                      |             |    |        |
| <b>4.A. ¿Cómo tratar el SAF obstétrico durante la gestación?</b>                                                                                                                                                                                                                                 |             |    |        |
| - En pacientes con SAF obstétrico e historia de abortos precoces (<10 semanas) de repetición se recomienda tratamiento con AAS a dosis bajas con o sin heparina de bajo peso molecular (HBPM) profiláctica asociada. <b>(NE 4 GR D).</b>                                                         | 9.14 (2.38) | 10 | 92.85% |
| - En pacientes con SAF obstétrico e historia de muerte fetal (>10 semanas) se sugiere tratamiento con AAS a dosis bajas y HBPM a dosis profilácticas <b>(NE4 GRD).</b>                                                                                                                           | 9.85 (0.36) | 10 | 100%   |
| - En pacientes con SAF obstétrico e historia de PE grave y/o insuficiencia placentaria, se recomienda tratamiento con AAS a dosis bajas (NE 1 -, GRB) +/- HBPM en función del perfil de riesgo individual <b>(NE4 GRD).</b>                                                                      | 8.92 (1.43) | 9  | 92.85% |
| - Se sugiere iniciar tratamiento con AAS de forma preconcepcional. <b>(NE2++ GRC).</b>                                                                                                                                                                                                           | 10 (0.00)   | 10 | 100%   |

|                                                                                                                                                                                                                                                                   |             |    |        |
|-------------------------------------------------------------------------------------------------------------------------------------------------------------------------------------------------------------------------------------------------------------------|-------------|----|--------|
| - En pacientes portadoras asintomáticas de AAF con perfil de alto riesgo se sugiere tratamiento con AAS. <b>(NE 4 GR D).</b>                                                                                                                                      | 9.78 (0.55) | 10 | 100%   |
| <b>4.B. ¿Cómo tratar un SAF obstétrico refractario?</b>                                                                                                                                                                                                           |             |    |        |
| - En las pacientes con abortos de repetición y/o pérdidas fetales refractarias a tratamiento con AAS + HBPM se recomienda añadir al tratamiento HCQ durante la totalidad del embarazo o prednisona a bajas dosis durante el primer trimestre. <b>(NE 2+ GRC).</b> | 9.78 (0.41) | 10 | 100%   |
| - En casos de CIR y/o preeclampsia precoz grave, se sugiere el uso de pravastatina 20mg/día desde el inicio de la preeclampsia. <b>(NE 2+ GRC).</b>                                                                                                               | 8.92 (2.31) | 10 | 92.85% |
| - No se recomienda uso de IVIG y plasmaféresis, si bien podría considerarse en ausencia de respuesta a otros tratamientos. <b>(NE 2 GRv).</b>                                                                                                                     | 9.35 (0.97) | 10 | 100%   |
| <b>4.C. ¿Cómo manejar la trombopenia en gestantes con SAF/AAF?</b>                                                                                                                                                                                                |             |    |        |
| - En pacientes gestantes con SAF y trombopenia, se sugiere tratar de forma similar a la trombopenia por LES. <b>(NE 3 GRD).</b>                                                                                                                                   | 9.71 (0.79) | 10 | 100%   |
| <b>4.D. ¿Cómo manejar la trombosis en gestantes con SAF/AAF?</b>                                                                                                                                                                                                  |             |    |        |
| - Se recomienda anticoagulación con HBPM antes que con HNF. <b>(NE1++GR A).</b>                                                                                                                                                                                   | 9.85 (0.51) | 10 | 100%   |

|                                                                                                                                                                                                                                                         |             |    |        |
|---------------------------------------------------------------------------------------------------------------------------------------------------------------------------------------------------------------------------------------------------------|-------------|----|--------|
| - Se recomienda utilizar HNF, fondaparinux, danaparoides, los filtros de vena cava y la trombolisis en situaciones especiales o contraindicación para HBPM. <b>(NE 2++ GRB)</b> .                                                                       | 9.92 (0.25) | 10 | 100%   |
| - No se recomiendan los nuevos anticoagulantes orales ya que no existen estudios sobre ellos en gestación. <b>(NE3 GRC)</b> .                                                                                                                           | 10 (0.00)   | 10 | 100%   |
| - Se sugiere mantener la anticoagulación durante toda la gestación y hasta 6 semanas postparto en AAF-, o indefinida si AAF+. <b>(NE4, GRD)</b> .                                                                                                       | 9.92 (0.25) | 10 | 100%   |
| <b>4.E. ¿La administración de HBPM a dosis terapéutica debería hacerse cada 12 o 24 horas?</b>                                                                                                                                                          |             |    |        |
| - No existe suficiente evidencia para recomendar una u otra pauta posológica. <b>(NE 2+ GRC)</b> .                                                                                                                                                      | 9.92 (0.25) | 10 | 100%   |
| - Se sugiere utilizar HBPM cada 24h debido a su posología favorable. <b>(NE4 GRV)</b> .                                                                                                                                                                 | 9.57 (1.11) | 10 | 92.85% |
| <b>4.F. ¿Se debe realizar analítica tras iniciar HBPM en gestantes con SAF/AAF?</b>                                                                                                                                                                     |             |    |        |
| - No existe suficiente evidencia para recomendar la determinación analítica en gestantes que inician tratamiento con HBPM. <b>(NE2++ GRB)</b> .                                                                                                         | 9.28 (1.82) | 10 | 92.85% |
| <b>4.G. ¿Cómo debemos realizar el paso a HBPM en gestantes con SAF y tratamiento previo con anticoagulantes orales anti-vitamina K?</b>                                                                                                                 |             |    |        |
| - Se sugiere sustituir los anticoagulantes orales anti-vitamina K por HBPM cuando el test de gestación sea positivo, recomendándose realizarlos frecuentemente para evitar detectar el embarazo más allá de la 6ª-8ª semana desde la fecha de la última | 9.35 (2.31) | 10 | 92.85% |

|                                                                                                                                                                                                                                        |             |    |        |
|----------------------------------------------------------------------------------------------------------------------------------------------------------------------------------------------------------------------------------------|-------------|----|--------|
| regla. <b>(NE2+ GRC).</b>                                                                                                                                                                                                              |             |    |        |
| <b>4.H. ¿Se debe realizar monitorización factor Xa en gestantes con SAF y/o AAF+ en tratamiento con HBPM?</b>                                                                                                                          |             |    |        |
| - No se recomienda monitorizar actividad factor Xa. <b>(NE 2 GRB).</b>                                                                                                                                                                 | 9.21 (2.30) | 10 | 92.85% |
| <b>5. Anticuerpos anti-Ro / anti-La y bloqueo cardíaco congénito (BCCC)</b>                                                                                                                                                            |             |    |        |
| <b>5.A. ¿Debemos tratar con HCQ a todas las gestantes anti-Ro+?</b>                                                                                                                                                                    |             |    |        |
| - Durante el embarazo, se sugiere utilizar HCQ en las mujeres con anticuerpos anti-Ro/anti-La positivos, ya que puede reducir el riesgo de BCC. <b>(NE 2+ GRC).</b>                                                                    | 10 (0.00)   | 10 | 100%   |
| <b>5.B. ¿En qué momento sería recomendable iniciar el tratamiento con HCQ?</b>                                                                                                                                                         |             |    |        |
| - Se sugiere iniciar el tratamiento con HCQ previo al embarazo, cuando comience el intento de gestación. <b>(NE 4, GRV).</b>                                                                                                           | 9.42 (1.44) | 10 | 92.85% |
| <b>5.C. ¿Cómo monitorizar la afectación cardíaca en gestantes anti-Ro+?</b>                                                                                                                                                            |             |    |        |
| - En mujeres embarazadas con anticuerpos anti-Ro y/o anti-La positivos se sugiere realizar despistaje de BCC mediante ecocardiografía-doppler, cada 2 semanas desde la semana 16-18 hasta la 30-34 de la gestación. <b>(NE 4 GRD).</b> | 9.64 (0.71) | 10 | 100%   |

|                                                                                                                                                                                                                                                                                                    |             |    |        |
|----------------------------------------------------------------------------------------------------------------------------------------------------------------------------------------------------------------------------------------------------------------------------------------------------|-------------|----|--------|
| - En mujeres embarazadas con anticuerpos anti-Ro y/o anti-La positivos y con antecedente de BCC o lupus neonatal previo, se recomienda realizar despistaje de BCC, semanalmente desde la semana 16 a la 26 de la gestación, y cada 2 semanas posteriormente hasta la semana 34. <b>(NE 4 GRD).</b> | 9.78 (0.55) | 10 | 100%   |
| <b>5.D. ¿Cuáles serían las pautas de tratamiento en gestantes anti-Ro+ con bloqueo cardiaco fetal grado I, II, III o fibroelastosis/hidrops fetal?</b>                                                                                                                                             |             |    |        |
| - En la primera determinación de un BC de primer grado, no se recomienda tratamiento. En el caso de BC de primer grado persistente, se sugiere el uso de GC fluorados se debe individualizar y no se recomienda el uso prolongado de dosis altas. <b>(NE 3 GR√).</b>                               | 9.07 (2.31) | 10 | 92.85% |
| - Se sugiere el uso de GC fluorados en casos de bloqueo cardiaco de 2º grado o de 3º grado asociado a hidrops fetal. <b>(NE 2+ GRC).</b>                                                                                                                                                           | 9.78 (0.55) | 10 | 100%   |
| - En casos particularmente graves, se sugiere plantear la terapia combinada con GC, IVIG y/o plasmaféresis. <b>(NE 3 GRD).</b>                                                                                                                                                                     | 9.35 (1.34) | 10 | 92.85% |
| - No se recomienda tratamiento con IVIG, ya que no se ha demostrado su eficacia. <b>(NE 2+ GRC).</b>                                                                                                                                                                                               | 9.78 (0.55) | 10 | 100%   |
| - Se sugiere no mantener tratamiento con dosis altas de GC desde el diagnóstico del BCC hasta el final del embarazo. <b>(NE 4, GR√).</b>                                                                                                                                                           | 9.85 (0.34) | 10 | 100%   |

|                                                                                                                                                                                                                                                                                               |             |    |      |
|-----------------------------------------------------------------------------------------------------------------------------------------------------------------------------------------------------------------------------------------------------------------------------------------------|-------------|----|------|
| - No hay datos que permitan recomendar el uso de dexametasona frente a betametasona. Pueden utilizarse indistintamente. <b>(NE 2+, GRC).</b>                                                                                                                                                  | 10 (0.00)   | 10 | 100% |
| <b>6. Defectos de placentación, complicaciones vasculares gestacionales</b>                                                                                                                                                                                                                   |             |    |      |
| <b>6. A. ¿A quién y cuándo hay que hacer screening de riesgo de preeclampsia (PE)?</b>                                                                                                                                                                                                        |             |    |      |
| - Se recomienda realizar el screening de PE a toda gestante al inicio del embarazo, investigando la presencia de factores de riesgo tanto previos al embarazo como gestacionales. <b>(NE 1++ GR A).</b>                                                                                       | 10 (0.00)   | 10 | 100% |
| - Se recomienda utilizar una combinación de diferentes factores de riesgo, como características maternas, antecedentes obstétricos y marcadores bioquímicos y biofísicos, incluyendo Doppler uteroplacentario, para el cálculo de riesgo específico de preeclampsia. <b>(NE1++ GR A).</b>     | 10 (0.00)   | 10 | 100% |
| - Se sugiere considerar la positividad para anticuerpos antifosfolípido (con o sin lupus) y la presencia o historia previa de nefritis lúpica como factores suficientes para inicio de profilaxis de PE, por lo que el screening podría no ser necesario en esas mujeres. <b>(NE2+ GR C).</b> | 9.85 (0.51) | 10 | 100% |
| - Se sugiere limitar la consideración como grupo de riesgo de PE a aquellas gestantes con determinaciones repetidamente positivas de anticuerpos antifosfolípido, particularmente a las portadoras de anticoagulante lúpico y/o dobles o triples                                              | 9.85 (0.51) | 10 | 100% |

|                                                                                                                                                                                                                                                       |             |    |      |
|-------------------------------------------------------------------------------------------------------------------------------------------------------------------------------------------------------------------------------------------------------|-------------|----|------|
| positivas. <b>(NE2+ GR C).</b>                                                                                                                                                                                                                        |             |    |      |
| - Se sugiere no considerar el LES inactivo sin historia de nefritis como un factor de riesgo a la hora de calcular el riesgo de PE. <b>(NE2++ GR B)</b>                                                                                               | 9.50 (0.90) | 10 | 100% |
| <b>6. B. ¿Debemos tratar con AAS a pacientes con PE previa o factores de riesgo de PE?</b>                                                                                                                                                            |             |    |      |
| - Se recomienda la administración de AAS a dosis bajas para prevención de riesgo de PE en gestantes consideradas de alto riesgo. <b>(NE1++ GRA).</b>                                                                                                  | 10 (0.00)   | 10 | 100% |
| - Se recomienda iniciar la profilaxis con AAS antes de las 16 semanas de gestación. <b>(NE1+ GR A).</b>                                                                                                                                               | 10 (0.00)   | 10 | 100% |
| - Se recomienda utilizar dosis de AAS entre 75-150 mg/día. <b>(NE1+ GRA).</b>                                                                                                                                                                         | 10 (0.00)   | 10 | 100% |
| - Se recomienda administrar AAS en gestantes de alto riesgo a partir de las 16 semanas si no ha podido iniciarse previamente. <b>NE1+ GRA)</b>                                                                                                        | 10 (0.00)   | 10 | 100% |
| - Se sugiere comenzar el tratamiento con AAS antes de la semana 12 en las pacientes con positividad mantenida para anticuerpos antifosfolípido (con o sin lupus) y/o presencia o historia previa de nefritis lúpica, sin esperar a los resultados del | 10 (0.00)   | 10 | 100% |

|                                                                                                                                                                                                                                                                                                                                        |             |    |      |
|----------------------------------------------------------------------------------------------------------------------------------------------------------------------------------------------------------------------------------------------------------------------------------------------------------------------------------------|-------------|----|------|
| screening. <b>(NE4 GRV).</b>                                                                                                                                                                                                                                                                                                           |             |    |      |
| <b>6.C. ¿Qué utilidad tiene el estudio Doppler de arterias uterinas (Aut) en estas pacientes?</b>                                                                                                                                                                                                                                      |             |    |      |
| - Se sugiere realizar Doppler de AUt en el 1er y 2º trimestre, como parte del control obstétrico de estas pacientes. El Doppler en el 1er trimestre puede ser de especial interés en gestantes con LES estimadas de bajo riesgo de PE, en las que su alteración podría justificar el inicio de profilaxis con AAS. <b>(NE 3 GR D).</b> | 9.92 (0.25) | 10 | 100% |
| - En gestaciones con Doppler de AUt patológico en segundo trimestre, se sugiere despistaje de RCIU (biometrías seriadas y Doppler de AU) desde la semana 26-28. <b>(NE 2+ GR C).</b>                                                                                                                                                   | 10 (0.00)   | 10 | 100% |
| <b>6.D. ¿Qué utilidad tiene el estudio Doppler de circulación fetal en estas pacientes?</b>                                                                                                                                                                                                                                            |             |    |      |
| - Se recomienda la utilización del Doppler de arteria umbilical como método primario de monitorización del feto pequeño para la edad gestacional (SGA) y el RCIU. <b>(NE1+ GRA).</b>                                                                                                                                                   | 9.92 (0.25) | 10 | 100% |
| - Se sugiere la utilización rutinaria del Doppler de arteria umbilical en mujeres con anticuerpos antifosfolípido y LES con factores de riesgo, obstétrico o médicos, para sufrir complicaciones vasculares gestacionales, especialmente RCIU. <b>(NE3 GRD).</b>                                                                       | 9.92 (0.25) | 10 | 100% |

Tabla 2. Diagnóstico diferencial entre nefritis lúpica y preeclampsia

|                                                 | PE/Eclampsia/HEL<br>LP | NL                          |
|-------------------------------------------------|------------------------|-----------------------------|
| <b>Inicio</b>                                   | > 20 SG                | En cualquier SG y postparto |
| <b>Exploración Física</b>                       |                        |                             |
| HTA                                             | +                      | +                           |
| Edema                                           | +                      | +                           |
| Dolor en HCD                                    | +                      | -                           |
| Convulsiones/M. neurológicas                    | +                      | +/-                         |
| Fiebre                                          | -                      | +/-                         |
| Eritema, artritis, úlceras, linfadenopatía, ... | -                      | +/-                         |
| <b>Laboratorio</b>                              |                        |                             |
| Sedimento urinario activo                       | -                      | +                           |
| Proteinuria                                     | + ( $\geq 20$ SG)      | + (en cualquier momento)    |
| Anemia                                          | +/-                    | +                           |
| Trombopenia                                     | + (casos graves)       | +/-                         |
| Hipocomplementemia                              | -                      | +                           |
| Anti-dsDNA                                      | -                      | +                           |
| AAF                                             | -                      | +/-                         |
| Ácido úrico                                     | Aumentado              | Normal/Aumentado en IR      |
| Alteración PFH                                  | + (casos graves)       | -                           |
| Cr sérica                                       | Habitualmente normal   | +/-                         |
| <b>Marcadores Angiogénesis</b>                  |                        |                             |
| Endoglina                                       | Aumentado              | Normal                      |
| Ratio sFlt1/PlGF                                | Aumentado              | Normal                      |
| mUtA -PI                                        | Alterado               | Normal                      |

|                                |                                                                                 |                                                                            |
|--------------------------------|---------------------------------------------------------------------------------|----------------------------------------------------------------------------|
| <b>Anatomía patológica</b>     | Endoteliosis,<br>pérdida de<br>fenestraciones,<br>oclusión de la luz<br>capilar | Dependiendo del tipo<br>histológico según<br>clasificación ISN/RPS (II-VI) |
| <b>Respuesta a corticoides</b> | No                                                                              | Sí                                                                         |

AAF: anticuerpos antifosfolípido; HCD: hipocondrio derecho; PE: preeclampsia; PFH: pruebas de función hepática; Cr: creatinina; ISN/RPS: International Society of Nephrology/Renal Pathology Society; sFlt-1/ PlGF: Ratio forma soluble de la tirosina quinasa 1/factor de crecimiento placentario; mUtA-PI: índice de pulsatilidad media en Doppler de arterias uterinas; SG: semanas gestación; IR: insuficiencia renal

Tabla 3. Contraindicaciones y precauciones para el uso de heparinas de bajo peso molecular (HBPM) en gestación.

| Contraindicaciones/precauciones para el uso de HBPM (104) | Ejemplos y situaciones relacionadas                              |
|-----------------------------------------------------------|------------------------------------------------------------------|
| Coagulopatías                                             | Hemofilia, Enfermedad de Von Willebrandt, coagulopatía adquirida |
| Sangrado activo                                           | Antenatal o posparto                                             |
| Alto riesgo hemorragia mayor                              | Placenta previa                                                  |
| Trombopenia                                               | <75.000                                                          |
| Ictus en 4 semanas previas                                | Hemorrágico o isquémico                                          |
| Insuficiencia renal grave                                 | Tasa filtración glomerular <30 ml/min/1.73m <sup>2</sup>         |
| Hepatopatía grave                                         | Varices o TP por encima de rango                                 |
| HTA no controlada                                         | TAS >200 mm Hg o TAD > 120 mm Hg                                 |

HBPM: heparina de bajo peso molecular, TP: tiempo de protrombina, HTA: hipertensión arterial, TAS: tensión arterial sistólica, TAD: tensión arterial diastólica.
